# Supplementary material for: Genome-wide parent-of-origin DNA methylation analysis reveals the intricacies of human imprinting and suggests a germline methylation-independent mechanism of establishment
Source: HighWire-hosted journal article supplement (doi:10.1101/gr.164913.113), 2014-01-08
Supplement: Supplemental_Figure_Legends.docx [file Supplemental_Figure_Legends.docx]

**Supplemental Figure S1.**

**Sample comparisons between WGBS and Illumina Infinium arrays.**

Linear regression analysis of individual CpG sites as revealed by the WGBS compared to corresponding Infinium probe β-values for blood, placenta, sperm, hES cells, brain and liver. The results are highly correlative when the same DNA samples are compared (blood, brain and placenta), and similar for DNA from different samples of the same tissue origin (sperm, liver and hES cells). The red and blue data points represent the probes mapping to known maternally and paternally methylated DMRs respectively.

**Supplemental Figure S2.**

**Genome-wide methylation profiling identifies novel allelic DMRs within known imprinted domains.**

(A) A map of the *SNRPN* domain on human chromosome 15, showing the position of the known imprinted transcripts and CpG islands with the methylation profile obtained using leukocyte-, brain- and liver-derived WGBS and Infinium array datasets. Vertical grey lines in the WGBS tracks represent the mean methylation value for individual CpG dinucleotides calculated from multiple data sets, with the light grey lines representing the mean + standard deviation. Infinium methylation values for normal tissues are represented by black dots, with values for the genome-wide UPDs (average pUPD in blue and mUPD in red) superimposed on the leukocyte methylation track. The methylation profiles were confirmed using standard bisulphite PCR and sequencing in brain and leukocyte DNA samples. Each circle represents a single CpG dinucleotide on a DNA strand, (⚫, methylated cytosine; O unmethylated cytosine). Each row corresponds to an individual cloned sequence. (B) The tissue-specific intergenic DMR identified within the *MEG8* gene on chromosome 14 as identified by combined WGBS and Infinium array analysis in leukocytes, brain and liver. The DMR was subsequently confirmed by bisulphite PCR and sequencing. (C) The novel DMR within CpG island 30 overlaps exon 2 of the *DIRAS3* transcript, in addition to the known promoter DMR. The WGBS and Infinium array analysis confirm that both regions are ubiquitous DMRs, which was confirmed using standard bisulphite PCR.

**Supplemental Figure S3.**

**Confirmation of allelic methylation at novel ubiquitously imprinted DMRs.**

The methylation profiles obtained using leukocyte-, brain- and liver-derived WGBS, Infinium array datasets for the (A) *PPIEL*, (B) *WRB* and (C) *NHP2L1* genes. Vertical grey lines in the WGBS tracks represent the mean methylation value for individual CpG dinucleotides calculated from multiple data sets, with the light grey lines representing the mean + standard deviation. Infinium methylation values for normal tissues are represented by black dots, with values for the genome-wide UPDs (average pUPD in blue and mUPD in red) superimposed on the leukocyte methylation track. The methylation profiles were confirmed using standard allelic bisulphite PCR with each circle representing a single CpG dinucleotide on a DNA strand, (⚫, methylated cytosine; O unmethylated cytosine). Each row corresponds to an individual cloned sequence. The sequence analysis of RT-PCR products that differentiate *NHP2L1* variant transcripts reveals imprinting specifically of isoform-2 at this locus.

**Supplemental Figure S4.**

**Specific hypermethylation of imprinted DMRs in placenta.**

(A) The methylation profiles obtained using leukocyte- and placenta-derived WGBS, Infinium array datasets and allelic bisulphite PCR for *NNAT* DMR. Infinium methylation values for normal leukocytes (black dots), with values for the genome-wide pUPD (blue) and mUPD (red) superimposed on the leukocyte WGBS track. Similarly Infinium methylation values for normal placenta (black dots) and hydatidiform mole (blue dots) are overlaid on the placental WGBS track. The error bars associated with the Infinium array probes represent the standard deviation of multiple biological samples. The methylation profiles were confirmed using standard bisulphite PCR on heterozygous DNA samples with each circle representing a single CpG dinucleotide on a DNA strand, (⚫, methylated cytosine; O unmethylated cytosine). Each row corresponds to an individual cloned sequence. (B) The dynamic methylation profiles of the *NESP*-AS DMR as revealed by WGBS and Infinium array datasets in leukocytes, placenta, sperm, phES cells and hES cells, along with meDIP-seq and H3K4me3 ChIP-seq reads for hES cells and sperm. The grey and black dots in the third panel represent Infinium probe methylation in hES cell lines derived from six-cell blastomeres and blostocytes, respectively. The gametic WGBS methylation profile is derived from sperm, with Infinium probe methylation values for sperm and phES cells represented by blue and red dots. The error bars associated with the Infinium array probes represent the standard deviation of the 2 sperm samples and 4 independent phES cells cell lines. The methylation profiles were confirmed using standard bisulphite PCR and sequencing.

**Supplemental Figure S5.**

**Confirmation of allelic methylation at placental-specific DMRs.**

(A) The allelic methylation profiles in placenta for *ZFAT, N4BP2L1, DCAF10, PDE4D, FAM196A, RGMA, AGBL3, MCCC1, ZC3H12C, DNMT1, AIM1, ZNF396, FAM20A, GLIS3* and *LIN28B*. The methylation profiles were confirmed using standard allelic bisulphite PCR with each circle representing a single CpG dinucleotide on a DNA strand, (⚫, methylated cytosine; O unmethylated cytosine). Each row corresponds to an individual cloned sequence. (B) Allelic expression was performed on placental samples heterozygous for exonic SNPs. Where possible, parental genotypes were also determined. The asterisk (*) in the sequence traces shows the position of the polymorphic base.

**Supplemental Figure S6.**

**Allelic methylation and expression analyses of murine loci orthologous human ubiquitous imprinted loci.**

The allelic methylation analysis using embryonic genomic DNA from intersubspecific mouse crosses (C57BL6/J (B) with JF1 (J)) revealed the absence of parental origin-specific methylation in the *Nhp2l1*, *Wdr27*, *Wrb* and *Htr5a* loci. The methylation profiles were confirmed using standard allelic bisulphite PCR with each circle representing a single CpG dinucleotide on a DNA strand, (⚫, methylated cytosine; O unmethylated cytosine). Each row corresponds to an individual cloned sequence. These genes were found to be biallelically expressed in early embryonic tissues. The asterisk (*) in the sequence traces shows the position of the polymorphic base.

**Supplemental Figure S7.**

**Allelic methylation and expression analyses of murine loci orthologous to human placental-specific imprinted loci.**

(A) The allelic methylation using placental genomic DNA from intersubspecific mouse crosses (C57BL6/J (B) with JF1 (J) or *Mus musculus castaneous* (C)) reveals an unmethylated profile for all regions assessed. The methylation profiles were confirmed using standard allelic bisulphite PCR with each circle representing a single CpG dinucleotide on a DNA strand, (⚫, methylated cytosine; O unmethylated cytosine). Each row corresponds to an individual cloned sequence. (B) The sequences tracks of RT-PCR products incorporating heterozygous polymorphisms showing biallelic expression of transcripts in the placenta if detected. The asterisk (*) in the sequence traces shows the position of the polymorphic base.

**Supplemental Figure S8.**

**Confirmation of differential methylation between parthenote-derived hES cells lines (phES)** **and sperm.**

The orthologous sequences of germline imprinted DMRs in the mouse are highlighted by the hatched box with all Infinium probes mapping ± 1kb shown. phES cells are in red, sperm in blue. DMRs specific to mouse are marked with an asterisk (*) and are not differentially methylated.

**Supplemental Figure S9.**

**Early developmental methylation dynamics at *NAPIL5* and *FAM50B* gene.**

(A) Contraction of the *NAPIL5* germline DMRs. WGBS and Infinium array datasets in leukocytes, sperm, phES cells and hES cells, along with meDIP-seq and H3K4me3 ChIP-seq reads for hES cells and sperm. The grey and black dots in the second panel represent Infinium probe methylation in hES cell lines derived from six-cell blastomeres (Val10B) and blastocysts (SHEF5), respectively. The gametic WGBS methylation profile is derived from sperm, with Infinium probe methylation values for sperm and phES cells represented by blue and red dots respectively. The error bars associated with the Infinium array probes represent the standard deviation of the 2 sperm samples and 4 independent phES cells cell lines. The extended interval of differential methylation between sperm and phES cells was confirmed using standard bisulphite PCR. Each circle representing a single CpG dinucleotide on a DNA strand, (⚫, methylated cytosine; O unmethylated cytosine) and each row corresponds to an individual cloned sequence. (B) The relocation of the *FAM50B* DMR during pre-implantation development. The colour code for the Infiunium array datasets superimposed on the WGBS track is the same as in (A). The methylation profile was confirmed using three different bisulphite PCRs mapping within the interval.

**Supplemental Figure S10.**

**The analysis of ZFP57 binding motifs in human imprinted DMRs.**

The H3K9me3 distribution at (A) ubiquitous germline imprinted DMRs and (B) placenta-specific DMRs in the H1 hES cells in relation to DNA methylation. The % methylation is derived from WGBS data, where as the grey shaded area depicts H3K9me3 abundance determined from ChIP-seq data. The number and location of the proposed TGCCmetGC hexonucleotide ZFP57 binding motif are shown (Z). The precise location of the DMRs are shown by the red brackets.
