# Supplementary material for: Genome-wide parent-of-origin DNA methylation analysis reveals the intricacies of human imprinting and suggests a germline methylation-independent mechanism of establishment
Source: HighWire-hosted journal article supplement (doi:10.1101/gr.164913.113), 2014-01-08
Supplement: Supplemental_Table_S1.xlsx [file Supplemental_Table_S1.xlsx]

## Sheet: 450K sliding windows analysis
seqnames	start	end	width	strand	delta mUPD Pupd	pval	blood in between	methylation
chr1	38461540	38461879	340	*	-0.33094085	0.00013019081407271	TRUE	pat
chr1	42384310	42384389	80	*	-0.369518675	9.23552709893835e-06	TRUE	pat
chr1	42384365	42384473	109	*	-0.372121333333333	2.46997540901787e-05	TRUE	pat
chr1	43814764	43815034	271	*	-0.327255133333333	3.17447898095996e-08	TRUE	pat
chr2	10637974	10638112	139	*	-0.317445925	0.00195355205903719	TRUE	pat
chr2	207116070	207118252	2183	*	-0.414063758333333	1.07793955604508e-09	TRUE	pat
chr2	207116401	207118287	1887	*	-0.370604825	6.75053963486289e-07	TRUE	pat
chr2	207118253	207127225	8973	*	-0.364511716666667	6.77350366613293e-07	TRUE	pat
chr2	207118288	207127363	9076	*	-0.391190325	1.48233312134892e-06	TRUE	pat
chr2	207127226	207129157	1932	*	-0.446535133333334	1.24765158962742e-07	TRUE	pat
chr2	207127364	207136183	8820	*	-0.452242016666667	1.6707770305543e-07	TRUE	pat
chr3	159557552	159557796	245	*	-0.325916483333333	5.30179855879832e-05	TRUE	pat
chr3	159557779	159558030	252	*	-0.344741391666667	5.1920142833779e-05	TRUE	pat
chr4	165898707	165898834	128	*	-0.330104308333333	0.00626784556120442	TRUE	pat
chr4	165898825	165898911	87	*	-0.308999575	0.0102108176954684	TRUE	pat
chr4	165898835	165898925	91	*	-0.329074816666667	0.00984580092502413	TRUE	pat
chr4	189376670	189376728	59	*	-0.420438525	0.00305105767035691	TRUE	pat
chr4	189376704	189395409	18706	*	-0.40871685	0.00308290597656375	TRUE	pat
chr5	1725285	1725822	538	*	-0.320526866666667	0.000764389272589529	TRUE	pat
chr5	42991495	42991861	367	*	-0.319370116666667	0.00379406762235553	TRUE	pat
chr5	74908125	74908169	45	*	-0.314325725	0.0154034995198751	TRUE	pat
chr5	176797920	176798048	129	*	-0.334964841666667	0.0193141562194298	TRUE	pat
chr6	28945322	28945340	19	*	-0.3168744375	0.0187319906310259	TRUE	pat
chr6	31240651	31240999	349	*	-0.367887958333334	0.00570224082025475	TRUE	pat
chr6	31240784	31241293	510	*	-0.347367425	0.00826851229751666	TRUE	pat
chr6	33049505	33050740	1236	*	-0.341364541666667	0.00135685793830495	TRUE	pat
chr6	33050124	33050887	764	*	-0.319542075	0.00739754110996175	TRUE	pat
chr6	75953853	75954052	200	*	-0.338865275	0.025565039607569	TRUE	pat
chr6	110736772	110736940	169	*	-0.395597833333333	1.5879354928996e-05	TRUE	pat
chr6	110736865	110736957	93	*	-0.360642591666667	1.57978296348616e-05	TRUE	pat
chr6	110736941	110737052	112	*	-0.349720325	3.02670621021694e-05	TRUE	pat
chr7	2764129	2764245	117	*	-0.421325918333333	9.98539760390749e-05	TRUE	pat
chr7	2802560	2802941	382	*	-0.321217116666667	0.00324760565534393	TRUE	pat
chr8	58055168	58055875	708	*	-0.340654708333333	0.0327296248986674	TRUE	pat
chr8	58055591	58056025	435	*	-0.32307385	0.0347091654615959	TRUE	pat
chr8	58055876	58056112	237	*	-0.368547958333333	0.031336499657437	TRUE	pat
chr11	1412397	1413281	885	*	-0.326768775	0.0413365044917805	TRUE	pat
chr11	1413145	1413314	170	*	-0.3292304	0.000197980549776799	TRUE	pat
chr11	2018724	2019089	366	*	-0.366134941666667	0.000869567646168488	TRUE	pat
chr11	2019079	2019115	37	*	-0.54691175	3.3749188150648e-09	TRUE	pat
chr11	2019090	2019128	39	*	-0.603683291666667	6.28215253571424e-10	TRUE	pat
chr11	2019116	2019166	51	*	-0.60462015	9.75789585351911e-10	TRUE	pat
chr11	2019129	2019435	307	*	-0.600123175	4.58381724274584e-09	TRUE	pat
chr11	2019167	2019451	285	*	-0.527031858333333	9.14403067077123e-08	TRUE	pat
chr11	2019436	2019567	132	*	-0.459629166666667	4.74492879884698e-07	TRUE	pat
chr11	2019452	2019586	135	*	-0.467279233333333	4.90233817264977e-07	TRUE	pat
chr11	2019568	2019605	38	*	-0.507905075	1.3383516832903e-07	TRUE	pat
chr11	2019587	2019623	37	*	-0.514431525	1.96411041597004e-07	TRUE	pat
chr11	2019606	2019625	20	*	-0.417999883333334	1.15159379089633e-06	TRUE	pat
chr11	2019624	2019654	31	*	-0.376274633333333	2.05932859027464e-06	TRUE	pat
chr11	2019626	2019666	41	*	-0.404912883333333	1.80717236266333e-06	TRUE	pat
chr11	2019655	2019729	75	*	-0.396270116666667	1.03654837988269e-05	TRUE	pat
chr11	2019667	2019731	65	*	-0.377019566666667	2.44632218804593e-05	TRUE	pat
chr11	2019730	2019735	6	*	-0.30013815	0.000301483357613879	TRUE	pat
chr11	2019732	2019797	66	*	-0.363863716666667	5.66733534246601e-05	TRUE	pat
chr11	2019736	2019822	87	*	-0.382184491666667	2.09187743942648e-05	TRUE	pat
chr11	2019798	2019858	61	*	-0.487662683333333	3.77471197065232e-07	TRUE	pat
chr11	2019823	2019861	39	*	-0.484213941666667	7.47281018444092e-08	TRUE	pat
chr11	2019859	2019929	71	*	-0.473128483333333	2.06371689888865e-08	TRUE	pat
chr11	2019862	2019942	81	*	-0.388443283333333	2.56595618392276e-07	TRUE	pat
chr11	2019930	2020027	98	*	-0.439207833333334	7.42142765413228e-07	TRUE	pat
chr11	2019943	2020029	87	*	-0.458615416666667	1.04141507088521e-07	TRUE	pat
chr11	2020028	2020035	8	*	-0.517172341666667	6.23465124816571e-10	TRUE	pat
chr11	2020030	2020100	71	*	-0.336851908333333	0.000134701467111577	TRUE	pat
chr11	2020286	2020313	28	*	-0.311693466666667	2.05289207221283e-07	TRUE	pat
chr11	2020296	2020416	121	*	-0.351769091666667	1.27396215420385e-07	TRUE	pat
chr11	2020314	2020536	223	*	-0.381308083333333	8.72435774646986e-07	TRUE	pat
chr11	2020417	2020548	132	*	-0.356843716666667	9.08648835424612e-06	TRUE	pat
chr11	2020537	2020555	19	*	-0.380676391666667	1.4281291286671e-05	TRUE	pat
chr11	2020549	2020559	11	*	-0.402023241666667	1.20447921816442e-05	TRUE	pat
chr11	2020556	2021102	547	*	-0.485287158333334	8.20182566110259e-08	TRUE	pat
chr11	2020560	2021242	683	*	-0.480518341666667	3.38189053080203e-08	TRUE	pat
chr11	2021103	2021657	555	*	-0.453224416666667	5.38079310132872e-08	TRUE	pat
chr11	2021243	2021914	672	*	-0.471737483333333	5.36162257479751e-07	TRUE	pat
chr11	2021658	2022323	666	*	-0.495830041666667	2.13544974889792e-07	TRUE	pat
chr11	2021915	2022385	471	*	-0.5056152	1.20166980004141e-07	TRUE	pat
chr11	2022324	2023449	1126	*	-0.441268125	1.96444435061743e-08	TRUE	pat
chr11	2022386	2023864	1479	*	-0.466822658333334	2.46473459222456e-08	TRUE	pat
chr11	2023450	2024125	676	*	-0.506079058333333	5.41687383325131e-09	TRUE	pat
chr11	2023865	2025905	2041	*	-0.386224258333333	0.000408832215469616	TRUE	pat
chr11	2153991	2154112	122	*	-0.384909016666667	2.85732154145305e-06	TRUE	pat
chr11	2154074	2154131	58	*	-0.49021305	2.19915961386205e-07	TRUE	pat
chr11	2154113	2154254	142	*	-0.479190733333334	8.7416577220773e-06	TRUE	pat
chr11	2154132	2154431	300	*	-0.431515716666667	1.73336754128721e-05	TRUE	pat
chr11	2154255	2154637	383	*	-0.381826825	0.000305141249860159	TRUE	pat
chr11	2154432	2154933	502	*	-0.356398883333333	0.00016037746054676	TRUE	pat
chr11	2154638	2154951	314	*	-0.325945441666667	2.2953943093347e-07	TRUE	pat
chr12	10095902	10096111	210	*	-0.371498858333333	0.00246531121647562	TRUE	pat
chr12	10095997	10096117	121	*	-0.354459091666667	0.00371098531582693	TRUE	pat
chr12	10096112	10096151	40	*	-0.403397558333333	0.000641878765450775	TRUE	pat
chr12	10096118	10096793	676	*	-0.322379958333333	0.00506663931619105	TRUE	pat
chr12	54385436	54385525	90	*	-0.356440275	0.000120346600167619	TRUE	pat
chr12	131488414	131488725	312	*	-0.311661925	4.36740046116738e-05	TRUE	pat
chr12	133186923	133187173	251	*	-0.301404558333333	0.00535793648771661	TRUE	pat
chr14	101290195	101290716	522	*	-0.331200233333333	0.00023532583692173	TRUE	pat
chr14	101290556	101290866	311	*	-0.436995266666667	3.00017271399432e-08	TRUE	pat
chr14	101290717	101291067	351	*	-0.453407908333334	3.65801033373721e-09	TRUE	pat
chr14	101290867	101291099	233	*	-0.375882191666667	4.09893679074704e-07	TRUE	pat
chr14	101291068	101291135	68	*	-0.34839295	2.31221533335529e-05	TRUE	pat
chr14	101291100	101291179	80	*	-0.309688641666667	0.000288760652691897	TRUE	pat
chr14	101291136	101291287	152	*	-0.312631791666667	0.000389572440861912	TRUE	pat
chr14	101291180	101291409	230	*	-0.376203558333334	8.44512234538887e-05	TRUE	pat
chr14	101291288	101291439	152	*	-0.393257433333334	1.89989073163215e-05	TRUE	pat
chr14	101291410	101291458	49	*	-0.445552866666667	2.36140924681278e-07	TRUE	pat
chr14	101291440	101291468	29	*	-0.37961855	5.81052272306495e-07	TRUE	pat
chr14	101291459	101291499	41	*	-0.392433025	4.08214915504044e-08	TRUE	pat
chr14	101291469	101291570	102	*	-0.376571841666667	8.06378820804947e-08	TRUE	pat
chr14	101291500	101291601	102	*	-0.404153391666667	9.94463331274231e-09	TRUE	pat
chr14	101291571	101291686	116	*	-0.371902866666667	4.14234900490142e-08	TRUE	pat
chr14	101291602	101291828	227	*	-0.386869633333333	3.67661269638237e-08	TRUE	pat
chr14	101291687	101291855	169	*	-0.465916508333333	2.75324214760539e-07	TRUE	pat
chr14	101291829	101291890	62	*	-0.535318741666666	2.63615830293083e-07	TRUE	pat
chr14	101291856	101291932	77	*	-0.577420391666667	1.6868422107138e-07	TRUE	pat
chr14	101291891	101291996	106	*	-0.520945291666667	1.61807531085612e-07	TRUE	pat
chr14	101291933	101292127	195	*	-0.488476125	4.728693760024e-07	TRUE	pat
chr14	101291997	101292148	152	*	-0.476798108333333	3.811412362966e-08	TRUE	pat
chr14	101292128	101292305	178	*	-0.499835458333333	8.57924609394189e-09	TRUE	pat
chr14	101292149	101292391	243	*	-0.51514895	6.54844912205282e-10	TRUE	pat
chr14	101292306	101292642	337	*	-0.50571065	1.2727176307323e-09	TRUE	pat
chr14	101292392	101292679	288	*	-0.48767455	3.3170464593885e-08	TRUE	pat
chr14	101292643	101292871	229	*	-0.4949281	2.2142121936979e-08	TRUE	pat
chr14	101292680	101292966	287	*	-0.559397625	3.82726520845888e-08	TRUE	pat
chr14	101292872	101293089	218	*	-0.563314858333333	7.57019967571719e-09	TRUE	pat
chr14	101292967	101293449	483	*	-0.519128325	9.77325282665064e-08	TRUE	pat
chr14	101293090	101293725	636	*	-0.433865716666667	2.96942773311546e-08	TRUE	pat
chr14	101293450	101293855	406	*	-0.43677105	3.03705384505317e-08	TRUE	pat
chr14	101293726	101294146	421	*	-0.37846815	1.32058351401122e-06	TRUE	pat
chr15	101093778	101093899	122	*	-0.301363108333333	0.0028664478221557	TRUE	pat
chr16	3493133	3493422	290	*	-0.428740633333333	0.00367935680794456	TRUE	pat
chr16	3493336	3493439	104	*	-0.477061691666667	0.00205374657744893	TRUE	pat
chr16	3493423	3493533	111	*	-0.490315375	0.000360757152719567	TRUE	pat
chr16	3493440	3493613	174	*	-0.373496591666667	0.00666781400126589	TRUE	pat
chr16	3493534	3493680	147	*	-0.374774008333333	0.00361015204213049	TRUE	pat
chr16	3493614	3493814	201	*	-0.334077541666667	0.0108963818106574	TRUE	pat
chr16	3493681	3493996	316	*	-0.435304966666667	0.000626562207840637	TRUE	pat
chr16	3493815	3494093	279	*	-0.451875366666667	0.000747200978912488	TRUE	pat
chr16	3493997	3494154	158	*	-0.51869375	4.32830502207991e-07	TRUE	pat
chr16	3494094	3497279	3186	*	-0.353658625	0.00263212200917887	TRUE	pat
chr19	11517079	11517259	181	*	-0.320601615	0.0033401199122248	TRUE	pat
chr19	48999042	49000896	1855	*	-0.350244683333333	0.000907912014621902	TRUE	pat
chr19	49001890	49002476	587	*	-0.4311294	7.27706839445058e-06	TRUE	pat
chr20	57414039	57414161	123	*	-0.382275125	4.02739915664426e-07	TRUE	pat
chr20	57414059	57414216	158	*	-0.351346533333333	3.2424130773999e-06	TRUE	pat
chr20	57414162	57414273	112	*	-0.311953375	0.000196690083273047	TRUE	pat
chr20	57414274	57414406	133	*	-0.312556566666667	6.71197068727344e-05	TRUE	pat
chr20	57414351	57414528	178	*	-0.439987991666667	1.5536455551367e-08	TRUE	pat
chr20	57414407	57414538	132	*	-0.4970314	3.58535253211232e-10	TRUE	pat
chr20	57414529	57414577	49	*	-0.524933108333334	2.15846632180419e-09	TRUE	pat
chr20	57414539	57414595	57	*	-0.486775458333333	1.33508230545862e-07	TRUE	pat
chr20	57414578	57414883	306	*	-0.500286766666667	2.24401962216069e-07	TRUE	pat
chr20	57414596	57414959	364	*	-0.510113925	1.50409309255538e-07	TRUE	pat
chr20	57414884	57415143	260	*	-0.538028233333334	2.23721681294033e-08	TRUE	pat
chr20	57414960	57415176	217	*	-0.531190641666667	2.5670849532991e-09	TRUE	pat
chr20	57415144	57415376	233	*	-0.567335708333333	2.47275251288852e-07	TRUE	pat
chr20	57415177	57415696	520	*	-0.543198633333333	7.22693568310567e-07	TRUE	pat
chr20	57415377	57416220	844	*	-0.541458833333333	7.18883709115558e-07	TRUE	pat
chr20	57415697	57416505	809	*	-0.470537666666667	5.67002104044256e-08	TRUE	pat
chr20	57416221	57416887	667	*	-0.4735964	7.56304600627347e-08	TRUE	pat
chr20	57416506	57417151	646	*	-0.476955433333333	3.51730110529645e-08	TRUE	pat
chr20	57416888	57417232	345	*	-0.506057616666667	1.90605989545408e-09	TRUE	pat
chr20	57417152	57418014	863	*	-0.534587525	5.31619250946736e-10	TRUE	pat
chr20	57417233	57420941	3709	*	-0.39415855	1.76307529413667e-05	TRUE	pat
chr22	42548356	42548791	436	*	-0.310852583333333	7.55169886697616e-06	TRUE	pat
chr22	42548783	42548867	85	*	-0.322125075	1.09606804910178e-06	TRUE	pat
chr1	11561497	11561710	214	*	0.327069758333333	0.00110632574847455	TRUE	mat
chr1	11561662	11561907	246	*	0.304185608333333	0.00791682115762399	TRUE	mat
chr1	39249425	39249603	179	*	0.378686291666667	0.000348716863614207	TRUE	mat
chr1	39249433	39249663	231	*	0.377028633333333	0.000511218025627352	TRUE	mat
chr1	39249604	39254896	5293	*	0.328907558333334	0.00438787023241459	TRUE	mat
chr1	40024971	40025410	440	*	0.356010175	0.00015121435920408	TRUE	mat
chr1	40025232	40025414	183	*	0.346304108333333	0.000171397590183855	TRUE	mat
chr1	68512539	68512776	238	*	0.353714883333333	0.00174445834244649	TRUE	mat
chr1	68512650	68512806	157	*	0.328240283333333	0.000403805449989187	TRUE	mat
chr1	68512777	68512844	68	*	0.360000816666667	0.000114413630729189	TRUE	mat
chr1	68512807	68512927	121	*	0.371939425	0.00087963369577709	TRUE	mat
chr1	68512845	68512970	126	*	0.387641941666667	0.00054229926823726	TRUE	mat
chr1	68512928	68513062	135	*	0.372395058333334	0.00105724626173448	TRUE	mat
chr1	68515788	68515976	189	*	0.388573325	0.00147651140169336	TRUE	mat
chr1	68515872	68516079	208	*	0.446552258333334	7.89564871644672e-05	TRUE	mat
chr1	68515977	68516100	124	*	0.503762941666667	1.98147978933264e-05	TRUE	mat
chr1	68516080	68516137	58	*	0.542447466666667	1.95077335472923e-08	TRUE	mat
chr1	68516101	68516271	171	*	0.551292075	4.11626511568989e-08	TRUE	mat
chr1	68516138	68516373	236	*	0.54125083	2.55682198572038e-07	TRUE	mat
chr1	68516272	68516452	181	*	0.553331205	2.43708991342074e-07	TRUE	mat
chr1	68516374	68516462	89	*	0.548542471666667	2.92530798467013e-07	TRUE	mat
chr1	68516453	68516464	12	*	0.543920641666667	3.84749466193433e-08	TRUE	mat
chr1	68516463	68516517	55	*	0.540239116666667	5.43985249310468e-08	TRUE	mat
chr1	68516465	68516712	248	*	0.536577133333333	1.71969226427343e-08	TRUE	mat
chr1	68516518	68517176	659	*	0.562148625	2.5839922657679e-09	TRUE	mat
chr1	68516713	68517204	492	*	0.58697275	1.21181616679743e-09	TRUE	mat
chr1	68517177	68517254	78	*	0.5520078	1.82624902936881e-07	TRUE	mat
chr1	68517205	68517272	68	*	0.532083033333333	1.59874756703323e-07	TRUE	mat
chr1	68517255	68517655	401	*	0.337118358333333	0.0445675338151512	TRUE	mat
chr1	102308808	102312609	3802	*	0.373813208333333	0.00010117710250554	TRUE	mat
chr1	102312608	102312670	63	*	0.44438125	3.22047452828791e-07	TRUE	mat
chr1	149147625	149148260	636	*	0.303260516666667	0.000215194172881171	TRUE	mat
chr1	149148208	149148311	104	*	0.3018311	0.000239715635246198	TRUE	mat
chr1	149170064	149170351	288	*	0.330568125	0.00129023174991014	TRUE	mat
chr1	152161237	152161520	284	*	0.313803359166667	0.0367905033309672	TRUE	mat
chr1	152161397	152161682	286	*	0.369500858333333	0.00434470068614585	TRUE	mat
chr1	152161521	152161884	364	*	0.421462433333333	4.1213322102001e-05	TRUE	mat
chr1	152161683	152161926	244	*	0.485464955833333	0.000128075902473222	TRUE	mat
chr1	152161885	152162024	140	*	0.4911065725	0.000207932870029814	TRUE	mat
chr1	152161927	152162506	580	*	0.3591699975	0.00299799684972115	TRUE	mat
chr1	248100276	248100406	131	*	0.336861125	0.0219431782873457	TRUE	mat
chr1	248100345	248100426	82	*	0.392718850833333	1.10503323181227e-06	TRUE	mat
chr1	248100407	248100584	178	*	0.442947195	6.45284458956797e-08	TRUE	mat
chr1	248100427	248100590	164	*	0.392122936666667	1.02061046226482e-08	TRUE	mat
chr1	248100585	248100599	15	*	0.4264176525	3.56583852991502e-09	TRUE	mat
chr1	248100591	248100613	23	*	0.426312975	3.37448051711174e-10	TRUE	mat
chr1	248100600	248101008	409	*	0.421953091666667	0.00031119731727581	TRUE	mat
chr2	177015044	177015124	81	*	0.338969675	0.000146888401472021	TRUE	mat
chr2	177015070	177015991	922	*	0.370566791666667	2.11194396712206e-06	TRUE	mat
chr2	177015125	177016036	912	*	0.336342016666667	0.000217000733894643	TRUE	mat
chr2	177015992	177016166	175	*	0.314109758333333	0.000357072620147882	TRUE	mat
chr2	239983744	239984029	286	*	0.340247066666667	0.0235162240334772	TRUE	mat
chr2	239983929	239984104	176	*	0.432984416666667	0.000215056059161804	TRUE	mat
chr2	241975140	241975970	831	*	0.374718570833334	0.0328114827997867	TRUE	mat
chr2	241975971	241976243	273	*	0.33238788	0.0116786928676565	TRUE	mat
chr3	27674461	27674613	153	*	0.445799205	0.00105287080008492	TRUE	mat
chr3	39543515	39543775	261	*	0.311338146666667	0.000290951983265084	TRUE	mat
chr3	39543547	39543966	420	*	0.301146396666667	5.13544755585007e-05	TRUE	mat
chr3	39543776	39544191	416	*	0.314197055	7.43440112710434e-05	TRUE	mat
chr3	42727160	42727488	329	*	0.358758258333333	0.00127318726852701	TRUE	mat
chr3	42727425	42727842	418	*	0.354061641666667	0.000647131401406821	TRUE	mat
chr3	196325238	196325551	314	*	0.371027515	0.0123602259764121	TRUE	mat
chr4	6107021	6107279	259	*	0.454169483333333	5.71185055966151e-09	TRUE	mat
chr4	6107131	6107319	189	*	0.451003491666667	3.17664107906028e-10	TRUE	mat
chr4	6107280	6107338	59	*	0.475919883333333	2.89944606223024e-10	TRUE	mat
chr4	6107320	6107632	313	*	0.427662766666667	7.96847523322225e-08	TRUE	mat
chr4	6107339	6107648	310	*	0.349455025	0.00140550088826536	TRUE	mat
chr4	89618324	89618532	209	*	0.623770639166667	4.69693857815119e-08	TRUE	mat
chr4	89618411	89618636	226	*	0.572749273333333	4.47209535542498e-08	TRUE	mat
chr4	89618533	89618666	134	*	0.590539041666667	1.21506773742592e-08	TRUE	mat
chr4	89618637	89618860	224	*	0.57732075	2.04368196710701e-07	TRUE	mat
chr4	89618667	89618981	315	*	0.553558308333334	7.22313012087631e-07	TRUE	mat
chr4	89618861	89619013	153	*	0.501698125	7.67930385210139e-06	TRUE	mat
chr4	89618982	89619022	41	*	0.480962508333333	1.94120457760871e-05	TRUE	mat
chr4	89619014	89619029	16	*	0.460530366666667	2.62817710030113e-05	TRUE	mat
chr4	89619023	89619037	15	*	0.494059741666667	7.31267545336681e-06	TRUE	mat
chr4	89619030	89619050	21	*	0.544758831666667	4.16268435143714e-06	TRUE	mat
chr4	89619038	89619052	15	*	0.584689898333333	1.40124732685045e-06	TRUE	mat
chr4	89619051	89619084	34	*	0.585749148333333	1.23187268407986e-06	TRUE	mat
chr4	89619053	89619235	183	*	0.481872391666667	6.98294005026685e-05	TRUE	mat
chr4	155702610	155703137	528	*	0.304728791666667	0.00012120745910171	TRUE	mat
chr5	191600	191792	193	*	0.315395491666667	5.03332841856744e-06	TRUE	mat
chr5	191628	191805	178	*	0.317606223333333	2.57704871167897e-05	TRUE	mat
chr5	134363562	134363822	261	*	0.335851	0.00131122714104468	TRUE	mat
chr5	140480597	140480871	275	*	0.305198333333333	0.00219192560512823	TRUE	mat
chr5	140719225	140719961	737	*	0.304601208333333	0.026518574846331	TRUE	mat
chr6	3848904	3849189	286	*	0.340567516666667	0.00865427917941925	TRUE	mat
chr6	3849095	3849234	140	*	0.432000366666667	0.00290954906307954	TRUE	mat
chr6	3849190	3849271	82	*	0.548488441666667	7.97476732534869e-08	TRUE	mat
chr6	3849235	3849276	42	*	0.522049608333334	3.40304133117596e-07	TRUE	mat
chr6	3849272	3849293	22	*	0.569154321666667	9.02500807456643e-07	TRUE	mat
chr6	3849277	3849326	50	*	0.562144146666667	3.56342426815341e-06	TRUE	mat
chr6	3849294	3849330	37	*	0.564348588333333	6.18185821758944e-06	TRUE	mat
chr6	3849327	3849349	23	*	0.52030471	1.42566975828329e-05	TRUE	mat
chr6	3849331	3849380	50	*	0.52991351	6.32944856721473e-06	TRUE	mat
chr6	3849350	3849390	41	*	0.553795451666667	7.0195374296065e-08	TRUE	mat
chr6	3849381	3849410	30	*	0.569393299166667	3.15329209274589e-08	TRUE	mat
chr6	3849391	3849433	43	*	0.539151240833334	3.81914805502245e-06	TRUE	mat
chr6	3849411	3849441	31	*	0.5280261075	1.60599975052518e-05	TRUE	mat
chr6	3849434	3849457	24	*	0.543961358333333	7.18088089703164e-06	TRUE	mat
chr6	3849442	3849474	33	*	0.586861933333334	1.67243057876296e-06	TRUE	mat
chr6	3849458	3849535	78	*	0.566089091666667	9.77886022990352e-07	TRUE	mat
chr6	3849475	3849541	67	*	0.539415208333333	1.4848625356026e-06	TRUE	mat
chr6	3849536	3849576	41	*	0.535137583333333	1.5966237956386e-06	TRUE	mat
chr6	3849542	3849687	146	*	0.527818525	2.22118119862451e-06	TRUE	mat
chr6	3849577	3849689	113	*	0.525387351666667	3.78811635846536e-06	TRUE	mat
chr6	3849688	3849701	14	*	0.504689343333333	3.18088368151691e-06	TRUE	mat
chr6	3849690	3849800	111	*	0.515808126666667	1.78841571522682e-06	TRUE	mat
chr6	3849702	3849817	116	*	0.51659645	2.79848551549035e-07	TRUE	mat
chr6	3849801	3850105	305	*	0.454078608333333	9.7300520182579e-07	TRUE	mat
chr6	17016226	17016483	258	*	0.339546355	6.40225113860001e-06	TRUE	mat
chr6	32116963	32117048	86	*	0.330841230833333	0.00584074721598126	TRUE	mat
chr6	32116994	32117078	85	*	0.329263200833333	0.0069359650631411	TRUE	mat
chr6	32117049	32117087	39	*	0.333911024166667	0.00267618526318288	TRUE	mat
chr6	144328421	144328916	496	*	0.554596475	5.19788819798461e-07	TRUE	mat
chr6	144328482	144329051	570	*	0.596468486666667	1.43226265316086e-07	TRUE	mat
chr6	144328917	144329171	255	*	0.571598378333333	1.07018519673477e-06	TRUE	mat
chr6	144329052	144329330	279	*	0.425647295	0.000122998919957263	TRUE	mat
chr6	144329172	144329381	210	*	0.370233208333334	0.000125671408223515	TRUE	mat
chr6	144329331	144329472	142	*	0.383137491666667	0.000103472897290155	TRUE	mat
chr6	144329382	144329484	103	*	0.46282315	7.43659852506453e-06	TRUE	mat
chr6	144329473	144329731	259	*	0.477052483333333	2.87516179241142e-05	TRUE	mat
chr6	144329485	144329765	281	*	0.505999095833333	2.05165631043974e-05	TRUE	mat
chr6	144329732	144329779	48	*	0.511192145833333	5.09487703160877e-05	TRUE	mat
chr6	144329766	144329788	23	*	0.570199670833334	1.01506941535937e-05	TRUE	mat
chr6	144329780	144329801	22	*	0.521818891666667	1.4307121937505e-05	TRUE	mat
chr6	144329789	144329828	40	*	0.557212008333334	3.1561211705895e-07	TRUE	mat
chr6	144329802	144329886	85	*	0.44676305	0.000275261904511997	TRUE	mat
chr6	144329829	144329908	80	*	0.464856625	4.81721900370964e-05	TRUE	mat
chr6	144329887	144329921	35	*	0.358349983333333	0.000287530294240556	TRUE	mat
chr6	144329909	144329961	53	*	0.337120775	0.00132228882118866	TRUE	mat
chr6	160023581	160023688	108	*	0.327338858333333	0.0127462533691622	TRUE	mat
chr6	160426268	160427500	1233	*	0.329840833333333	0.0219076027795104	TRUE	mat
chr6	170048424	170055331	6908	*	0.3542692	0.040810598673057	TRUE	mat
chr6	170055155	170057476	2322	*	0.351983433333333	0.0480125657807038	TRUE	mat
chr7	4901750	4901797	48	*	0.323525193333333	0.0030800481647278	TRUE	mat
chr7	5183992	5184154	163	*	0.355422341666667	0.021163998810159	TRUE	mat
chr7	5184014	5184294	281	*	0.310906875	0.0445818324178687	TRUE	mat
chr7	16890879	16891078	200	*	0.335521816666667	0.0131040835686278	TRUE	mat
chr7	27127448	27127575	128	*	0.326900833333333	4.15055599839184e-05	TRUE	mat
chr7	27127501	27127751	251	*	0.355488783333333	0.000266127636198376	TRUE	mat
chr7	27127576	27128045	470	*	0.3422046975	0.00089521048638363	TRUE	mat
chr7	27127752	27128168	417	*	0.318034955833333	0.000116579943874313	TRUE	mat
chr7	27134109	27134258	150	*	0.33427315	9.25968687762221e-07	TRUE	mat
chr7	27134225	27134368	144	*	0.338187583333333	0.000470493165784138	TRUE	mat
chr7	27137922	27138395	474	*	0.321769841666667	0.00030819516982036	TRUE	mat
chr7	27138173	27138711	539	*	0.3108798	0.000845042551715393	TRUE	mat
chr7	27138396	27138750	355	*	0.302887308333333	0.00478569870436282	TRUE	mat
chr7	50849639	50849804	166	*	0.399808066666667	0.0173325346917279	TRUE	mat
chr7	50849723	50849930	208	*	0.527082241666667	0.000177185882514665	TRUE	mat
chr7	50849805	50850563	759	*	0.591447916666667	1.95392401301434e-06	TRUE	mat
chr7	50849931	50850869	939	*	0.576385558333333	1.02262007152172e-07	TRUE	mat
chr7	50850564	50851502	939	*	0.409219525	0.0386981738168771	TRUE	mat
chr7	94285642	94285684	43	*	0.376267858333333	5.72206699781633e-06	TRUE	mat
chr7	94285672	94285711	40	*	0.48616505	2.05334803273926e-07	TRUE	mat
chr7	94285685	94285744	60	*	0.517578725	1.65951036754976e-07	TRUE	mat
chr7	94285712	94285758	47	*	0.547460375	1.10660334333809e-07	TRUE	mat
chr7	94285745	94285767	23	*	0.542938541666667	1.89415025785194e-07	TRUE	mat
chr7	94285759	94285776	18	*	0.494856641666667	9.18946160712484e-07	TRUE	mat
chr7	94285768	94285783	16	*	0.513085683333334	1.02384431917501e-06	TRUE	mat
chr7	94285777	94285813	37	*	0.458764008333333	3.72998192458111e-06	TRUE	mat
chr7	94285784	94285872	89	*	0.466061175	9.55308912367323e-07	TRUE	mat
chr7	94285814	94285886	73	*	0.480878725	1.52868604580312e-07	TRUE	mat
chr7	94285873	94285901	29	*	0.567254441666667	1.89414334126154e-09	TRUE	mat
chr7	94285887	94285910	24	*	0.6411459025	5.43691625494767e-09	TRUE	mat
chr7	94285902	94285941	40	*	0.647634269166667	1.24200056975435e-09	TRUE	mat
chr7	94285911	94285950	40	*	0.623220535833333	3.73603466877089e-08	TRUE	mat
chr7	94285942	94285959	18	*	0.587278091666667	1.59514085174562e-08	TRUE	mat
chr7	94285951	94285992	42	*	0.6084293	1.05442619701187e-08	TRUE	mat
chr7	94285960	94286085	126	*	0.613894208333334	9.52657864826021e-09	TRUE	mat
chr7	94285993	94286109	117	*	0.6076027	3.35608716528425e-09	TRUE	mat
chr7	94286086	94286130	45	*	0.570056083333333	3.07758202885997e-08	TRUE	mat
chr7	94286110	94286207	98	*	0.561038341666667	1.46256064447992e-07	TRUE	mat
chr7	94286131	94286218	88	*	0.556107683333333	2.47340275493352e-07	TRUE	mat
chr7	94286208	94286231	24	*	0.550512791666667	2.67240578348829e-07	TRUE	mat
chr7	94286219	94286242	24	*	0.519722866666667	8.30636787165207e-07	TRUE	mat
chr7	94286232	94286260	29	*	0.539808140833334	1.49800283508146e-05	TRUE	mat
chr7	94286243	94286262	20	*	0.5088765575	5.4222752914442e-05	TRUE	mat
chr7	94286261	94286266	6	*	0.516386274166667	5.18116068917865e-05	TRUE	mat
chr7	94286263	94286293	31	*	0.469401725	5.86567730242371e-06	TRUE	mat
chr7	94286267	94286303	37	*	0.5077812375	2.52424813074722e-05	TRUE	mat
chr7	94286294	94286342	49	*	0.535568220833333	9.40561092674562e-06	TRUE	mat
chr7	94286304	94286350	47	*	0.5601666375	1.45938738877149e-06	TRUE	mat
chr7	94286343	94286361	19	*	0.557500733333333	4.09712205338473e-07	TRUE	mat
chr7	94286351	94286419	69	*	0.570469541666667	4.14280510636109e-07	TRUE	mat
chr7	94286362	94286430	69	*	0.584166766666667	2.46917727584748e-07	TRUE	mat
chr7	94286420	94286472	53	*	0.599980083333333	1.09935886325137e-07	TRUE	mat
chr7	94286431	94286483	53	*	0.585838458333334	1.35987614692192e-07	TRUE	mat
chr7	94286473	94286510	38	*	0.549356658333333	2.13053520899808e-07	TRUE	mat
chr7	94286484	94286520	37	*	0.512980783333334	8.85993844930689e-07	TRUE	mat
chr7	94286511	94286525	15	*	0.501424616666667	9.78026521344656e-07	TRUE	mat
chr7	94286521	94286558	38	*	0.536362908333333	3.8453154674592e-07	TRUE	mat
chr7	94286526	94286631	106	*	0.556041433333333	1.3817979417875e-07	TRUE	mat
chr7	94286559	94286649	91	*	0.578476941666667	6.43047299088558e-08	TRUE	mat
chr7	94286632	94286668	37	*	0.571447575	2.33412861879516e-08	TRUE	mat
chr7	94286650	94286759	110	*	0.6074408	5.88857757009446e-09	TRUE	mat
chr7	94286669	94286792	124	*	0.601705433333333	6.14284590461433e-09	TRUE	mat
chr7	94286760	94286833	74	*	0.620520566666667	5.84509345933288e-09	TRUE	mat
chr7	94286793	94286935	143	*	0.608000475	6.91143042076674e-09	TRUE	mat
chr7	94286834	94286952	119	*	0.554799408333333	1.44544616338843e-07	TRUE	mat
chr7	94286936	94286954	19	*	0.511048416666667	7.29382494195005e-07	TRUE	mat
chr7	94286953	94287185	233	*	0.500761908333333	1.6044470353572e-05	TRUE	mat
chr7	94286955	94287210	256	*	0.537050838333334	7.34004044307456e-06	TRUE	mat
chr7	94287186	94287241	56	*	0.57432745	4.82266634830821e-10	TRUE	mat
chr7	130130122	130130186	65	*	0.339022583333333	2.49654853533116e-08	TRUE	mat
chr7	130130155	130130287	133	*	0.346868958333333	4.87841127830207e-07	TRUE	mat
chr7	130130187	130130319	133	*	0.3422057	1.74756588849308e-07	TRUE	mat
chr7	130130288	130130382	95	*	0.365195608333334	6.00897786288132e-07	TRUE	mat
chr7	130130320	130130477	158	*	0.343081408333334	1.15003832237459e-06	TRUE	mat
chr7	130130383	130130480	98	*	0.364625116666667	2.63853726945258e-09	TRUE	mat
chr7	130130478	130130587	110	*	0.343818833333333	3.72802193901579e-05	TRUE	mat
chr7	130130481	130130739	259	*	0.45333675	2.45261041642275e-05	TRUE	mat
chr7	130130588	130130746	159	*	0.495649391666667	9.91989258743614e-06	TRUE	mat
chr7	130130740	130130752	13	*	0.6200789725	2.02401780876284e-07	TRUE	mat
chr7	130130747	130130917	171	*	0.6131296975	4.18478472589203e-07	TRUE	mat
chr7	130130753	130130994	242	*	0.6527023475	1.04355715440918e-08	TRUE	mat
chr7	130130918	130131084	167	*	0.595735775	1.49713191096257e-09	TRUE	mat
chr7	130130995	130131135	141	*	0.58105535	4.37406318534558e-10	TRUE	mat
chr7	130131085	130131137	53	*	0.554515708333334	2.95301480660386e-11	TRUE	mat
chr7	130131136	130131145	10	*	0.546308008333333	4.13624686414549e-09	TRUE	mat
chr7	130131138	130131188	51	*	0.500822208333333	2.7394153800551e-08	TRUE	mat
chr7	130131146	130131257	112	*	0.463769966666667	3.15833810433231e-06	TRUE	mat
chr7	130131189	130131267	79	*	0.45665845	6.96199478727998e-07	TRUE	mat
chr7	130131258	130131358	101	*	0.531648441666667	1.48574133228586e-07	TRUE	mat
chr7	130131268	130131366	99	*	0.574490141666667	7.75888590470459e-09	TRUE	mat
chr7	130131359	130131402	44	*	0.589717425	1.71076859636227e-09	TRUE	mat
chr7	130131367	130131479	113	*	0.514537133333334	1.93662024483474e-06	TRUE	mat
chr7	130131403	130131483	81	*	0.456626866666667	4.98605192367366e-06	TRUE	mat
chr7	130131480	130131632	153	*	0.445338591666667	5.85580340641823e-06	TRUE	mat
chr7	130131484	130131675	192	*	0.529770808333333	7.22647971699086e-06	TRUE	mat
chr7	130131633	130131690	58	*	0.603818675	2.78060485638429e-08	TRUE	mat
chr7	130131676	130131708	33	*	0.651480175	3.80711907143712e-09	TRUE	mat
chr7	130131691	130131729	39	*	0.624275083333333	1.53511315528038e-08	TRUE	mat
chr7	130131709	130131796	88	*	0.628847025	2.7855219061149e-08	TRUE	mat
chr7	130131730	130131825	96	*	0.594296166666667	4.03165373019224e-08	TRUE	mat
chr7	130131797	130131828	32	*	0.628258045833334	1.02777595808049e-07	TRUE	mat
chr7	130131826	130131868	43	*	0.643207701666667	1.80104042521822e-07	TRUE	mat
chr7	130131829	130131884	56	*	0.626675826666667	4.97097897711378e-07	TRUE	mat
chr7	130131869	130131886	18	*	0.592399105833334	1.87955989989002e-06	TRUE	mat
chr7	130131885	130131904	20	*	0.572317233333334	2.08237166237523e-06	TRUE	mat
chr7	130131887	130131915	29	*	0.564532341666667	2.72042303070371e-06	TRUE	mat
chr7	130131905	130131922	18	*	0.489914516666667	1.35838850078174e-05	TRUE	mat
chr7	130131916	130131930	15	*	0.393230733333333	6.59286364151929e-05	TRUE	mat
chr7	130131923	130132160	238	*	0.360086066666667	7.89821349778433e-05	TRUE	mat
chr7	130131931	130132198	268	*	0.442374933333333	4.58603276629702e-05	TRUE	mat
chr7	130132161	130132258	98	*	0.516912866666667	2.91066880054308e-06	TRUE	mat
chr7	130132199	130132264	66	*	0.591426033333334	3.39015930518276e-07	TRUE	mat
chr7	130132259	130132285	27	*	0.541200208333333	4.36311653949711e-07	TRUE	mat
chr7	130132265	130132297	33	*	0.548835708333333	3.21846892760884e-07	TRUE	mat
chr7	130132286	130132304	19	*	0.480720808333333	3.70371202484196e-06	TRUE	mat
chr7	130132298	130132318	21	*	0.4785791	4.79138914697976e-06	TRUE	mat
chr7	130132305	130132359	55	*	0.49652775	1.29551585671241e-05	TRUE	mat
chr7	130132319	130132418	100	*	0.554151358333333	2.55504529024489e-06	TRUE	mat
chr7	130132360	130132421	62	*	0.580969175	4.77515346997138e-08	TRUE	mat
chr7	130132419	130132452	34	*	0.5312946	8.68454740897982e-07	TRUE	mat
chr7	130132422	130132789	368	*	0.458712775	1.74544238183657e-05	TRUE	mat
chr7	130132453	130133109	657	*	0.431783466666667	1.49124015323258e-05	TRUE	mat
chr7	130132790	130134487	1698	*	0.301031108333334	0.010660205746698	TRUE	mat
chr7	138348981	138349442	462	*	0.341842475	0.00208852851416889	TRUE	mat
chr7	154862548	154862968	421	*	0.349169591666667	2.0140945825145e-05	TRUE	mat
chr7	154862770	154863175	406	*	0.476184025	1.62249015007557e-06	TRUE	mat
chr7	154862969	154863243	275	*	0.440093625	0.000648485822746187	TRUE	mat
chr7	154863176	154863337	162	*	0.393391858333334	0.00625204834648795	TRUE	mat
chr7	154863244	154863380	137	*	0.32511265	0.00767466615492536	TRUE	mat
chr7	158750244	158750416	173	*	0.3297441	6.08539224949538e-06	TRUE	mat
chr7	158750384	158750606	223	*	0.358734466666667	1.93416767672071e-07	TRUE	mat
chr7	158750417	158750984	568	*	0.370516466666667	9.87888090996576e-07	TRUE	mat
chr7	158750607	158751183	577	*	0.422493933333333	1.21872569580945e-06	TRUE	mat
chr7	158750985	158751590	606	*	0.361301408333333	0.0115482500535103	TRUE	mat
chr8	1321333	1321726	394	*	0.4031144	2.99350052706828e-05	TRUE	mat
chr8	37605552	37605782	231	*	0.322853516666667	1.90743181090131e-06	TRUE	mat
chr8	37605717	37605935	219	*	0.3141856	0.0172355588629156	TRUE	mat
chr8	37605783	37605977	195	*	0.317512941666667	0.0139423481777217	TRUE	mat
chr8	39172097	39172110	14	*	0.348481808333333	0.00262077005982443	TRUE	mat
chr8	39172099	39172119	21	*	0.338843925	0.00155078814110301	TRUE	mat
chr8	141108113	141108997	885	*	0.431760325	0.00225189083647345	TRUE	mat
chr8	141108607	141109050	444	*	0.583369201666667	1.3312780711573e-06	TRUE	mat
chr8	141108998	141109730	733	*	0.603809043333334	4.61288637266814e-07	TRUE	mat
chr8	141109051	141110259	1209	*	0.567682435	5.85173211057172e-06	TRUE	mat
chr8	141109731	141110746	1016	*	0.543891875	2.76375773163013e-06	TRUE	mat
chr8	141110260	141110899	640	*	0.559502033333333	3.31823243746114e-06	TRUE	mat
chr8	141110747	141111079	333	*	0.61048045	4.74213255889299e-09	TRUE	mat
chr8	141110900	141114390	3491	*	0.418384375	0.0355466358851684	TRUE	mat
chr9	98075146	98075491	346	*	0.383541	0.0374180946115376	TRUE	mat
chr9	98075481	98079128	3648	*	0.541963408333333	5.44755098054379e-05	TRUE	mat
chr9	98075492	98079447	3956	*	0.351049925	0.0244444716907753	TRUE	mat
chr9	129377854	129379318	1465	*	0.32319294	0.0272695144926306	TRUE	mat
chr9	140311437	140312445	1009	*	0.448174115833333	0.00139704868044293	TRUE	mat
chr10	27702528	27703246	719	*	0.342941825	0.00265844501255647	TRUE	mat
chr10	27702774	27703288	515	*	0.317173208333333	0.00101173430867174	TRUE	mat
chr10	27703247	27703328	82	*	0.321157516666667	0.00345476638830726	TRUE	mat
chr10	27703289	27703335	47	*	0.312358483333333	0.00331450025726176	TRUE	mat
chr10	27703329	27703361	33	*	0.358083791666667	0.00107601518597417	TRUE	mat
chr10	27703336	27703376	41	*	0.319459075	0.00335435286338854	TRUE	mat
chr10	43844651	43846375	1725	*	0.481863439166667	0.0316301661561199	TRUE	mat
chr10	43846376	43846573	198	*	0.647100811666667	3.10256104909321e-06	TRUE	mat
chr10	43846539	43846704	166	*	0.513379853333333	0.000889486952858181	TRUE	mat
chr10	121578384	121578638	255	*	0.340590066666667	0.000555188817515998	TRUE	mat
chr11	1457119	1457345	227	*	0.3761181	1.75868387061737e-06	TRUE	mat
chr11	2718307	2720462	2156	*	0.392939925	0.0233819393446335	TRUE	mat
chr11	2720229	2720809	581	*	0.57966235	5.51982594094915e-08	TRUE	mat
chr11	2720463	2721206	744	*	0.579332541666667	3.18642892910413e-08	TRUE	mat
chr11	2720810	2721242	433	*	0.491901075	6.79994947149137e-06	TRUE	mat
chr11	2721207	2721247	41	*	0.4188892	7.12729138073423e-05	TRUE	mat
chr11	2721243	2721335	93	*	0.439753779166667	0.00012970988296211	TRUE	mat
chr11	2721248	2721350	103	*	0.4752012125	4.01763720896789e-05	TRUE	mat
chr11	2721336	2721365	30	*	0.566377268333333	2.49511067185584e-06	TRUE	mat
chr11	2721351	2721382	32	*	0.57417995	2.3113296658381e-06	TRUE	mat
chr11	2721366	2721408	43	*	0.662513425	1.53331462761876e-08	TRUE	mat
chr11	2721383	2721436	54	*	0.598222194166667	1.81386748173262e-07	TRUE	mat
chr11	2721409	2721479	71	*	0.569700264166667	2.17894568828005e-07	TRUE	mat
chr11	2721437	2721590	154	*	0.514429089166667	1.14373606381514e-06	TRUE	mat
chr11	2721480	2721609	130	*	0.4999200225	5.03351962094243e-06	TRUE	mat
chr11	2721591	2721618	28	*	0.425156775	3.5477187081327e-06	TRUE	mat
chr11	2721610	2721631	22	*	0.421508825	8.08554035973715e-06	TRUE	mat
chr11	2721619	2721798	180	*	0.449294508333334	1.37020304420672e-05	TRUE	mat
chr11	2721632	2721816	185	*	0.517337191666667	2.70341457749836e-06	TRUE	mat
chr11	2721799	2721856	58	*	0.528441775	5.69991361263452e-07	TRUE	mat
chr11	2721817	2721865	49	*	0.512617233333334	1.38631030952817e-06	TRUE	mat
chr11	2721857	2721951	95	*	0.4955319	1.96515435561407e-06	TRUE	mat
chr11	2721866	2722061	196	*	0.540087855	1.31781694261801e-05	TRUE	mat
chr11	2721952	2722072	121	*	0.581616675	2.21988295509005e-07	TRUE	mat
chr11	2722062	2722075	14	*	0.648652716666667	4.43872241006744e-10	TRUE	mat
chr11	2722073	2722081	9	*	0.624878336666667	3.17934882365677e-07	TRUE	mat
chr11	2722076	2722083	8	*	0.639263975	2.83601570034556e-07	TRUE	mat
chr11	2722082	2722085	4	*	0.614497125	4.13764990266024e-08	TRUE	mat
chr11	2722084	2722194	111	*	0.5849882	1.33573412093583e-08	TRUE	mat
chr11	2722086	2722257	172	*	0.535212816666667	2.39777872126424e-08	TRUE	mat
chr11	2722195	2722339	145	*	0.453104991666667	4.64929651853996e-06	TRUE	mat
chr11	116370272	116371329	1058	*	0.310642833333333	0.0311442325433339	TRUE	mat
chr11	116371188	116371390	203	*	0.399570383333333	0.00321226540222705	TRUE	mat
chr12	14926744	14926985	242	*	0.336036783333333	0.000210975116256529	TRUE	mat
chr12	47219737	47219796	60	*	0.323882515833333	0.0474171963209989	TRUE	mat
chr12	114107712	114107802	91	*	0.400316683333333	0.00517231337314615	TRUE	mat
chr12	114885621	114886360	740	*	0.3049127	7.67629414073941e-05	TRUE	mat
chr12	130821962	130822602	641	*	0.312310941666667	0.000955838002680407	TRUE	mat
chr12	130822286	130822604	319	*	0.345583583333333	0.000344028920704759	TRUE	mat
chr12	130824015	130824327	313	*	0.3122248375	0.0380993295997376	TRUE	mat
chr12	132671062	132671472	411	*	0.338650325833333	0.000104222695339947	TRUE	mat
chr12	132671235	132671671	437	*	0.348570900833333	0.00160321585771742	TRUE	mat
chr13	20716432	20716727	296	*	0.39055362	0.000373802443162272	TRUE	mat
chr13	48892551	48893173	623	*	0.339627366666667	0.00246338858336464	TRUE	mat
chr13	48892948	48893375	428	*	0.449617683333334	1.19983177478506e-05	TRUE	mat
chr13	48893174	48893726	553	*	0.516805416666667	2.2616933096841e-10	TRUE	mat
chr13	48893376	48893967	592	*	0.480042275	2.41349251133158e-09	TRUE	mat
chr13	48893727	48894213	487	*	0.413748533333334	0.000201581212632167	TRUE	mat
chr13	48893968	48894381	414	*	0.365690075	0.000192179139695556	TRUE	mat
chr13	48894214	48894594	381	*	0.390253966666667	4.39357882678487e-06	TRUE	mat
chr13	48894382	48895240	859	*	0.439198541666667	1.53553719415374e-08	TRUE	mat
chr13	48894595	48895317	723	*	0.412207541666667	3.38061430009923e-07	TRUE	mat
chr13	48895241	48895477	237	*	0.436174833333333	6.94175662288774e-07	TRUE	mat
chr13	48895318	48895969	652	*	0.337194358333333	0.000426748880842772	TRUE	mat
chr13	112984602	112984839	238	*	0.351838683333334	0.0124026036364772	TRUE	mat
chr13	112984728	112984975	248	*	0.3961268	0.013307423951042	TRUE	mat
chr13	112984840	112985462	623	*	0.384798785833334	0.00618585052989401	TRUE	mat
chr13	112986635	112986926	292	*	0.360154083333333	0.00160821523817087	TRUE	mat
chr13	112986667	112986977	311	*	0.3870796	0.000591671089523712	TRUE	mat
chr13	112986927	112989199	2273	*	0.341548225	0.0319754691320231	TRUE	mat
chr14	101194145	101194747	603	*	0.336469583333333	7.50409395858996e-06	TRUE	mat
chr15	23807180	23810162	2983	*	0.34292555	0.00791981691013785	TRUE	mat
chr15	23891780	23892655	876	*	0.3965171	0.0427444174870092	TRUE	mat
chr15	23892574	23892769	196	*	0.573505575	7.49959498289603e-09	TRUE	mat
chr15	23892656	23893024	369	*	0.564093	1.70454723591392e-08	TRUE	mat
chr15	23892770	23893039	270	*	0.529470675	1.39680392247122e-07	TRUE	mat
chr15	23893025	23893741	717	*	0.3894367	0.000247992103117079	TRUE	mat
chr15	23893040	23894197	1158	*	0.331172758333333	0.000831207485926612	TRUE	mat
chr15	23931451	23932369	919	*	0.324520883333333	0.012369252054476	TRUE	mat
chr15	23931674	23932372	699	*	0.403288483333333	0.0040378011857288	TRUE	mat
chr15	23932370	23932396	27	*	0.525076825	1.09164731653434e-07	TRUE	mat
chr15	23932373	23932411	39	*	0.569980821666667	4.84371614862379e-07	TRUE	mat
chr15	23932397	23932619	223	*	0.561816146666667	6.51299580781404e-08	TRUE	mat
chr15	23932412	23932757	346	*	0.381502205	0.0160919601414442	TRUE	mat
chr15	24123705	24142934	19230	*	0.328573816666667	0.0255696767176335	TRUE	mat
chr15	24142920	24142999	80	*	0.381425875	0.00110403725816746	TRUE	mat
chr15	24142935	24347062	204128	*	0.319396225	0.00124083949394609	TRUE	mat
chr15	25018132	25018301	170	*	0.352769825	6.65660975516191e-07	TRUE	mat
chr15	25018227	25018448	222	*	0.307103854166667	2.10911195176449e-05	TRUE	mat
chr15	25031239	25068753	37515	*	0.312668833333333	0.0289756694584854	TRUE	mat
chr15	25068738	25068756	19	*	0.583312533333334	1.53882135663899e-08	TRUE	mat
chr15	25068754	25068762	9	*	0.648874658333334	8.77705960133878e-10	TRUE	mat
chr15	25068757	25068768	12	*	0.615445133333334	7.84415295708145e-08	TRUE	mat
chr15	25068763	25068789	27	*	0.557148775	2.26088611485293e-07	TRUE	mat
chr15	25068769	25068849	81	*	0.528650316666667	1.84157620915014e-07	TRUE	mat
chr15	25068790	25069375	586	*	0.324255441666667	0.0311443457905325	TRUE	mat
chr15	25068850	25092068	23219	*	0.302879691666667	0.031260855627476	TRUE	mat
chr15	25092069	25093365	1297	*	0.47701955	2.57376045586671e-06	TRUE	mat
chr15	25093244	25093455	212	*	0.505892208333333	1.19974461005617e-05	TRUE	mat
chr15	25093366	25093520	155	*	0.479903733333333	5.7910108631716e-08	TRUE	mat
chr15	25123287	25123490	204	*	0.42129185	9.87609380144278e-05	TRUE	mat
chr15	25123381	25123687	307	*	0.440533416666667	6.22898827703129e-05	TRUE	mat
chr15	25123491	25123730	240	*	0.439688116666667	2.04075037006706e-05	TRUE	mat
chr15	25199713	25200405	693	*	0.465402941666667	0.00332273890712544	TRUE	mat
chr15	25200253	25200489	237	*	0.640117325	2.05674998383568e-07	TRUE	mat
chr15	25200406	25201019	614	*	0.659425091666667	1.13014349268632e-07	TRUE	mat
chr15	25200490	25201223	734	*	0.648381716666667	4.63973782554916e-08	TRUE	mat
chr15	25201020	25201428	409	*	0.544906266666667	8.35362901043009e-06	TRUE	mat
chr15	25201224	25201731	508	*	0.54634623	2.02671876218451e-05	TRUE	mat
chr15	45314789	45314932	144	*	0.441055879166667	0.000192904382684461	TRUE	mat
chr15	45314915	45314942	28	*	0.429891804166667	0.000120951822237035	TRUE	mat
chr15	45314933	45315296	364	*	0.3309817625	0.00676918201793097	TRUE	mat
chr15	69222592	69223017	426	*	0.3185225	0.02027571399771	TRUE	mat
chr15	95870440	95870474	35	*	0.368378208333333	0.00210919384811262	TRUE	mat
chr15	99408636	99408957	322	*	0.458435941666667	0.000793993454456489	TRUE	mat
chr15	99408804	99409193	390	*	0.464490308333333	0.00069009316912161	TRUE	mat
chr15	99408958	99409359	402	*	0.430398616666667	0.00146162563252977	TRUE	mat
chr15	99409194	99409410	217	*	0.41770135	0.00176909933525242	TRUE	mat
chr15	99409360	99409505	146	*	0.396923308333333	0.00193181948213817	TRUE	mat
chr17	6558064	6558439	376	*	0.528540303333333	0.0065442469547552	TRUE	mat
chr17	6558365	6558814	450	*	0.669399703333333	8.14354033768912e-10	TRUE	mat
chr17	6558440	6559108	669	*	0.446139825	0.000176344259721732	TRUE	mat
chr17	37024020	37024168	149	*	0.301791833333333	0.0264129225263127	TRUE	mat
chr17	37093398	37123668	30271	*	0.421929916666667	0.0437894231251994	TRUE	mat
chr17	37123638	37123670	33	*	0.569229725	1.38979975803312e-05	TRUE	mat
chr17	37123669	37123710	42	*	0.498280633333333	4.63725274281785e-05	TRUE	mat
chr17	70120182	70120410	229	*	0.33159335	0.00303717327586259	TRUE	mat
chr17	76871734	76876039	4306	*	0.300517533333333	0.000117475767334872	TRUE	mat
chr17	76875678	76876205	528	*	0.381509883333334	2.24413055492069e-07	TRUE	mat
chr17	76876040	76876238	199	*	0.352224625	1.37253837295295e-05	TRUE	mat
chr18	29304111	29304481	371	*	0.307979480833333	0.00496554334834797	TRUE	mat
chr18	77377119	77377588	470	*	0.385314348333333	0.00556052262611374	TRUE	mat
chr19	1465556	1466161	606	*	0.313498801666667	0.017640964696711	TRUE	mat
chr19	4784940	4785373	434	*	0.369783595	0.00237618144691942	TRUE	mat
chr19	34112304	34112315	12	*	0.33746195	5.510998462403e-07	TRUE	mat
chr19	54040774	54040817	44	*	0.551391175	7.23129277855723e-08	TRUE	mat
chr19	54040813	54041162	350	*	0.545754956666667	1.7793137702911e-06	TRUE	mat
chr19	54040818	54041250	433	*	0.560688806666667	1.81157681505659e-07	TRUE	mat
chr19	54041163	54041302	140	*	0.559267175833334	1.61420582815304e-07	TRUE	mat
chr19	54041251	54041307	57	*	0.590020123333333	5.7894482601964e-08	TRUE	mat
chr19	54041303	54041328	26	*	0.58218184	6.5840447644963e-07	TRUE	mat
chr19	54041308	54041397	90	*	0.539564679166667	1.31180878344544e-06	TRUE	mat
chr19	54041329	54041855	527	*	0.529619891666667	2.59424482471033e-07	TRUE	mat
chr19	54041398	54041998	601	*	0.40279765	0.000381664158002762	TRUE	mat
chr19	54055365	54057414	2050	*	0.3653135	0.048840618069711	TRUE	mat
chr19	54057208	54057704	497	*	0.531181425	9.06443495528245e-07	TRUE	mat
chr19	54057415	54058084	670	*	0.535056583333333	3.6152331290547e-06	TRUE	mat
chr19	55476665	55477652	988	*	0.318553091666667	0.0403028951183717	TRUE	mat
chr19	55476717	55477754	1038	*	0.316627408333333	0.0396577380699298	TRUE	mat
chr19	55477755	55478261	507	*	0.311220925	0.0420758470707787	TRUE	mat
chr19	57346735	57349678	2944	*	0.400154675	0.000947297817002348	TRUE	mat
chr19	57349204	57349708	505	*	0.579122025	1.57576454695352e-06	TRUE	mat
chr19	57349679	57349814	136	*	0.483080083333334	1.40732301346276e-05	TRUE	mat
chr19	57349709	57350003	295	*	0.524835016666667	7.42641015010615e-07	TRUE	mat
chr19	57349815	57350095	281	*	0.534053666666667	1.11965341654491e-06	TRUE	mat
chr19	57350004	57350291	288	*	0.53889895	1.04298310219626e-06	TRUE	mat
chr19	57350096	57350312	217	*	0.446893125	4.46964093951742e-05	TRUE	mat
chr19	57350292	57350502	211	*	0.403600066666667	0.000152135903410457	TRUE	mat
chr19	57350313	57350845	533	*	0.442603983333333	0.000168619486208154	TRUE	mat
chr19	57350503	57351212	710	*	0.4611176	2.05905665145025e-06	TRUE	mat
chr19	57350846	57351321	476	*	0.538388133333333	4.5196618240617e-07	TRUE	mat
chr19	57351213	57351439	227	*	0.509418	2.55281764683371e-06	TRUE	mat
chr19	57351322	57351641	320	*	0.527158933333334	1.30275062522606e-06	TRUE	mat
chr19	57351440	57351790	351	*	0.432191341666667	1.90517714801362e-06	TRUE	mat
chr19	57351642	57352013	372	*	0.427298925	2.78058861916408e-05	TRUE	mat
chr19	57351791	57352017	227	*	0.477081333333334	4.90314191858428e-05	TRUE	mat
chr19	57352014	57352020	7	*	0.534779408333333	6.87636757262252e-08	TRUE	mat
chr19	57352018	57352073	56	*	0.600830941666667	5.16109955922501e-09	TRUE	mat
chr19	57352021	57352133	113	*	0.556168516666667	6.99937503876302e-08	TRUE	mat
chr19	57352074	57352141	68	*	0.5406125	3.24294993724679e-07	TRUE	mat
chr19	57352134	57352175	42	*	0.534631125	1.28424720612186e-07	TRUE	mat
chr19	57352142	57352184	43	*	0.556614683333334	1.50961043947639e-07	TRUE	mat
chr19	57352176	57352251	76	*	0.602304358333333	2.75851627849328e-08	TRUE	mat
chr19	57352185	57352268	84	*	0.56264155	8.77522795763194e-08	TRUE	mat
chr19	57352252	57352464	213	*	0.568200858333334	5.4009074767251e-08	TRUE	mat
chr19	57352269	57352518	250	*	0.52304335	6.61036719093731e-09	TRUE	mat
chr19	57352465	57352541	77	*	0.535652858333333	9.17477187283971e-07	TRUE	mat
chr19	57352519	57352583	65	*	0.511748783333333	8.89759019450407e-06	TRUE	mat
chr19	57352542	57352656	115	*	0.524759991666667	4.75873509847027e-06	TRUE	mat
chr19	57352584	57352685	102	*	0.534667383333334	6.37156837707951e-07	TRUE	mat
chr19	57352657	57352728	72	*	0.525191858333333	2.10540588030188e-07	TRUE	mat
chr19	57352686	57352745	60	*	0.500963708333333	2.29650220903841e-06	TRUE	mat
chr19	57352729	57352784	56	*	0.459062241666667	1.26689022338724e-06	TRUE	mat
chr19	57352746	57352806	61	*	0.423915266666667	1.2851332223059e-06	TRUE	mat
chr19	57352785	57353127	343	*	0.31201365	0.00395829539914651	TRUE	mat
chr19	58861502	58862062	561	*	0.306689525	0.0312652020916898	TRUE	mat
chr20	30134929	30135107	179	*	0.650002046666667	2.72852796161196e-07	TRUE	mat
chr20	30134973	30135123	151	*	0.6423358125	3.87915687092482e-07	TRUE	mat
chr20	30135108	30135148	41	*	0.669490048333333	3.46612966354996e-09	TRUE	mat
chr20	30135124	30135157	34	*	0.6330720375	9.44526285197485e-09	TRUE	mat
chr20	30135149	30135176	28	*	0.622064584166667	1.49029191815068e-08	TRUE	mat
chr20	30135158	30135290	133	*	0.622954798333333	1.09335372028796e-08	TRUE	mat
chr20	30135177	30135361	185	*	0.64713189	8.00853367257398e-10	TRUE	mat
chr20	30135291	30138142	2852	*	0.436635983333333	0.0488460840259633	TRUE	mat
chr20	36148457	36148614	158	*	0.309500783333333	2.15615691839025e-06	TRUE	mat
chr20	36148604	36148619	16	*	0.374838483333333	1.65100789611724e-06	TRUE	mat
chr20	36148615	36148641	27	*	0.377317616666667	5.71188721725671e-08	TRUE	mat
chr20	36148620	36148671	52	*	0.38208825	2.12200699795813e-08	TRUE	mat
chr20	36148642	36148678	37	*	0.342649158333334	3.34820628518903e-08	TRUE	mat
chr20	36148672	36148698	27	*	0.361999591666667	1.82743610549764e-07	TRUE	mat
chr20	36148679	36148737	59	*	0.345354291666667	5.55450589675358e-07	TRUE	mat
chr20	36148699	36148766	68	*	0.362547366666667	6.16756826176094e-08	TRUE	mat
chr20	36148738	36148774	37	*	0.355601791666667	4.9211099673548e-11	TRUE	mat
chr20	36148767	36148778	12	*	0.388745416666667	5.49070096006755e-12	TRUE	mat
chr20	36148775	36148790	16	*	0.355521058333333	3.28590354181083e-08	TRUE	mat
chr20	36148779	36148802	24	*	0.331216066666667	2.47162550295092e-07	TRUE	mat
chr20	36148803	36148927	125	*	0.351562058333333	3.1362342761981e-05	TRUE	mat
chr20	36148860	36148953	94	*	0.37235625	7.32790959346132e-06	TRUE	mat
chr20	36148928	36148960	33	*	0.39622445	7.90843140503096e-09	TRUE	mat
chr20	36148954	36148993	40	*	0.354166241666667	7.82845539740217e-11	TRUE	mat
chr20	36148961	36149012	52	*	0.334342466666667	8.74898598235646e-08	TRUE	mat
chr20	36148994	36149021	28	*	0.329076608333333	7.00189101434258e-09	TRUE	mat
chr20	36149013	36149052	40	*	0.327157016666667	4.27108751963887e-09	TRUE	mat
chr20	36149022	36149080	59	*	0.380186875	3.09032708319564e-07	TRUE	mat
chr20	36149053	36149111	59	*	0.375835275	1.10136853124538e-07	TRUE	mat
chr20	36149081	36149118	38	*	0.362690075	8.54009122860933e-07	TRUE	mat
chr20	36149112	36149120	9	*	0.324564533333333	4.19175204956743e-10	TRUE	mat
chr20	36149119	36149184	66	*	0.325704383333333	6.92523526046507e-10	TRUE	mat
chr20	36149121	36149187	67	*	0.333424558333333	1.21019962517981e-09	TRUE	mat
chr20	36149185	36149193	9	*	0.3411689	4.11801837591381e-10	TRUE	mat
chr20	36149188	36149230	43	*	0.385260333333333	9.73485057259155e-06	TRUE	mat
chr20	36149194	36149451	258	*	0.396882641666667	2.24579078132683e-06	TRUE	mat
chr20	36149231	36149454	224	*	0.3482859	0.000595293165644084	TRUE	mat
chr20	36149452	36149655	204	*	0.308390216666667	6.4417329499543e-05	TRUE	mat
chr20	36149455	36149705	251	*	0.343041541666667	0.000231065188572042	TRUE	mat
chr20	36149656	36149749	94	*	0.425595866666667	3.68667329981166e-08	TRUE	mat
chr20	36149706	36150060	355	*	0.54411305	1.1243062449845e-06	TRUE	mat
chr20	36149750	36151002	1253	*	0.428697441666667	0.0218130258983706	TRUE	mat
chr20	42142236	42142450	215	*	0.378095375	0.000522762504345	TRUE	mat
chr20	42142417	42142483	67	*	0.43943525	2.16505761758837e-09	TRUE	mat
chr20	42142451	42142493	43	*	0.467886133333333	3.6028658802727e-10	TRUE	mat
chr20	42142484	42142558	75	*	0.47214345	2.83169603711181e-09	TRUE	mat
chr20	42142494	42142595	102	*	0.514008423333334	7.81819106612304e-07	TRUE	mat
chr20	42142559	42142670	112	*	0.53789074	5.56223849895382e-07	TRUE	mat
chr20	42142596	42142672	77	*	0.5867033025	1.95440535069391e-07	TRUE	mat
chr20	42142671	42142698	28	*	0.577286779166667	6.11484809532533e-07	TRUE	mat
chr20	42142673	42142750	78	*	0.5861981625	1.02158999391182e-06	TRUE	mat
chr20	42142699	42142765	67	*	0.570776683333333	6.26259359773784e-07	TRUE	mat
chr20	42142751	42142783	33	*	0.616126463333333	1.34142458775303e-07	TRUE	mat
chr20	42142766	42142846	81	*	0.651146688333333	9.87527554964424e-10	TRUE	mat
chr20	42142784	42142851	68	*	0.643814138333333	8.53715706860418e-10	TRUE	mat
chr20	42142847	42142896	50	*	0.62287495	2.35217311885942e-10	TRUE	mat
chr20	42142852	42142946	95	*	0.587886483333333	1.13279673112648e-10	TRUE	mat
chr20	42142897	42142994	98	*	0.584576208333333	1.1077777689299e-10	TRUE	mat
chr20	42142947	42143014	68	*	0.544719775	2.43519903917311e-09	TRUE	mat
chr20	42142995	42143044	50	*	0.516578866666667	3.53681041059578e-09	TRUE	mat
chr20	42143015	42143095	81	*	0.516422508333334	7.22380659800365e-09	TRUE	mat
chr20	42143045	42143173	129	*	0.562466466666667	3.82880819081317e-08	TRUE	mat
chr20	42143096	42143210	115	*	0.562044741666667	7.18024234540186e-07	TRUE	mat
chr20	42143174	42143398	225	*	0.561767516666667	1.46785168971179e-06	TRUE	mat
chr20	42143211	42143488	278	*	0.549492508333333	2.09299600337147e-06	TRUE	mat
chr20	42143399	42143501	103	*	0.585902475	7.37164545878542e-07	TRUE	mat
chr20	44782039	44784897	2859	*	0.307066741666667	0.0465617487810503	TRUE	mat
chr20	44838776	44839186	411	*	0.364129525	0.00910262015274173	TRUE	mat
chr20	57425515	57425985	471	*	0.447819216666667	0.00404887817918158	TRUE	mat
chr20	57425979	57425993	15	*	0.569181483333334	6.26440566252862e-08	TRUE	mat
chr20	57425986	57426130	145	*	0.5625683	2.85074109807375e-08	TRUE	mat
chr20	57425994	57426137	144	*	0.5969657	3.06329150306897e-09	TRUE	mat
chr20	57426131	57426214	84	*	0.580245858333333	2.94735725462657e-08	TRUE	mat
chr20	57426138	57426263	126	*	0.474615758333333	0.000365158514587265	TRUE	mat
chr20	57426215	57426273	59	*	0.451991758333333	0.000241751278151918	TRUE	mat
chr20	57426264	57426321	58	*	0.44663285	0.000563377992850731	TRUE	mat
chr20	57426274	57426367	94	*	0.541136475	2.10094984350302e-08	TRUE	mat
chr20	57426322	57426373	52	*	0.552134916666667	3.19293332044894e-08	TRUE	mat
chr20	57426368	57426382	15	*	0.524910441666667	1.12821979825811e-07	TRUE	mat
chr20	57426374	57426390	17	*	0.508275875	2.50977639271936e-07	TRUE	mat
chr20	57426383	57426394	12	*	0.473013975	1.38531447274713e-06	TRUE	mat
chr20	57426391	57426419	29	*	0.479646508333333	6.2427998749422e-07	TRUE	mat
chr20	57426395	57426424	30	*	0.456223833333333	1.36053806647551e-07	TRUE	mat
chr20	57426420	57426537	118	*	0.493726991666667	5.88637649354605e-08	TRUE	mat
chr20	57426425	57426544	120	*	0.530102125	9.78648374844573e-08	TRUE	mat
chr20	57426538	57426569	32	*	0.523894483333333	8.82021537362577e-07	TRUE	mat
chr20	57426545	57426579	35	*	0.469144375	3.84020452583172e-06	TRUE	mat
chr20	57426570	57426742	173	*	0.453866466666667	1.09109251459495e-06	TRUE	mat
chr20	57426580	57426748	169	*	0.457908108333333	1.00925881895487e-06	TRUE	mat
chr20	57426743	57426756	14	*	0.474100166666667	4.66895382514254e-07	TRUE	mat
chr20	57426749	57426758	10	*	0.491088881666667	5.43445083031194e-06	TRUE	mat
chr20	57426757	57426788	32	*	0.488931823333334	3.33806668695137e-06	TRUE	mat
chr20	57426759	57426800	42	*	0.526108423333333	6.7823713354248e-07	TRUE	mat
chr20	57426789	57426834	46	*	0.531614883333334	1.3786593221833e-07	TRUE	mat
chr20	57426801	57426857	57	*	0.561023475	1.12870505057016e-07	TRUE	mat
chr20	57426835	57426930	96	*	0.587888468333333	7.04179232292927e-08	TRUE	mat
chr20	57426858	57426949	92	*	0.556019826666667	9.51479870243704e-07	TRUE	mat
chr20	57426931	57426978	48	*	0.561995076666667	1.53830679478748e-06	TRUE	mat
chr20	57426950	57427009	60	*	0.490232483333333	7.24379804358365e-06	TRUE	mat
chr20	57426979	57427016	38	*	0.4982197225	6.76645763533224e-06	TRUE	mat
chr20	57427010	57427029	20	*	0.469642989166667	1.19827976607124e-05	TRUE	mat
chr20	57427017	57427045	29	*	0.480487880833333	9.81852688324081e-06	TRUE	mat
chr20	57427030	57427102	73	*	0.504336966666667	3.17200403911843e-06	TRUE	mat
chr20	57427046	57427116	71	*	0.515111008333333	7.28970953730108e-07	TRUE	mat
chr20	57427103	57427145	43	*	0.529388325	1.3704197392483e-07	TRUE	mat
chr20	57427117	57427169	53	*	0.519480716666667	1.36317781517841e-08	TRUE	mat
chr20	57427146	57427172	27	*	0.483201658333333	1.8194293515139e-06	TRUE	mat
chr20	57427170	57427209	40	*	0.418154258333333	1.27738201250344e-05	TRUE	mat
chr20	57427173	57427236	64	*	0.399405583333333	5.6634520727352e-06	TRUE	mat
chr20	57427210	57427273	64	*	0.42476555	8.32803201124359e-06	TRUE	mat
chr20	57427237	57427411	175	*	0.468300066666667	1.39181195141422e-05	TRUE	mat
chr20	57427274	57427425	152	*	0.395966425	3.85172916727299e-06	TRUE	mat
chr20	57427412	57427442	31	*	0.341125825	4.45064264102724e-06	TRUE	mat
chr20	57427426	57427471	46	*	0.418902064166667	2.44671126246567e-05	TRUE	mat
chr20	57427443	57427482	40	*	0.534938120833333	1.89460376718891e-06	TRUE	mat
chr20	57427472	57427492	21	*	0.597755565	7.25240399710314e-10	TRUE	mat
chr20	57427483	57427494	12	*	0.493326684166667	1.16421568698678e-07	TRUE	mat
chr20	57427493	57427502	10	*	0.4840872275	7.61549871935668e-07	TRUE	mat
chr20	57427495	57427555	61	*	0.4929409	1.8679989672588e-07	TRUE	mat
chr20	57427503	57427641	139	*	0.492882558333333	9.32387284966007e-08	TRUE	mat
chr20	57427556	57427649	94	*	0.35925155	1.38063527672363e-06	TRUE	mat
chr20	57427642	57427729	88	*	0.371656199166667	1.04447555847277e-05	TRUE	mat
chr20	57427650	57427737	88	*	0.4140617325	3.97208613026962e-06	TRUE	mat
chr20	57427730	57427761	32	*	0.4518560825	8.05739117950429e-07	TRUE	mat
chr20	57427738	57427820	83	*	0.377972425	5.59515703311624e-07	TRUE	mat
chr20	57427762	57427829	68	*	0.410631916666667	1.96194039419831e-05	TRUE	mat
chr20	57427821	57427941	121	*	0.422548185	4.37538160462249e-05	TRUE	mat
chr20	57427830	57427972	143	*	0.50646203	6.89669459572169e-06	TRUE	mat
chr20	57427942	57428031	90	*	0.339934638333333	0.00392942914329173	TRUE	mat
chr20	57429277	57430312	1036	*	0.538765516666667	3.91904570976318e-06	TRUE	mat
chr20	57429858	57430662	805	*	0.513174300833333	3.62803044059167e-06	TRUE	mat
chr20	57430313	57431201	889	*	0.520561084166667	2.70887854657687e-06	TRUE	mat
chr20	57430663	57431302	640	*	0.5868052525	6.52979871800324e-08	TRUE	mat
chr20	57463270	57463329	60	*	0.311050441666667	5.50447537514626e-05	TRUE	mat
chr20	57463325	57463354	30	*	0.301031708333333	0.000117064120130606	TRUE	mat
chr20	57463330	57463356	27	*	0.305332033333333	9.04054533850976e-05	TRUE	mat
chr20	57463355	57463396	42	*	0.373603725	0.00188403474515599	TRUE	mat
chr20	57463357	57463454	98	*	0.438792608333333	0.000599405544109177	TRUE	mat
chr20	57463397	57463502	106	*	0.549498475	1.16831900939721e-08	TRUE	mat
chr20	57463455	57463526	72	*	0.5455478	2.28711272310557e-08	TRUE	mat
chr20	57463503	57463529	27	*	0.565143741666667	2.63108853663087e-08	TRUE	mat
chr20	57463527	57463571	45	*	0.578160841666667	5.82717282770176e-08	TRUE	mat
chr20	57463530	57463614	85	*	0.563394708333333	1.54652843216798e-07	TRUE	mat
chr20	57463572	57463652	81	*	0.608512211666667	2.76177823231668e-08	TRUE	mat
chr20	57463615	57463724	110	*	0.609891211666667	2.09157533177873e-08	TRUE	mat
chr20	57463653	57463762	110	*	0.552408186666667	2.48521518294743e-06	TRUE	mat
chr20	57463725	57463766	42	*	0.5295250875	4.33389957725649e-06	TRUE	mat
chr20	57463763	57463774	12	*	0.4687987625	2.88956377639988e-05	TRUE	mat
chr20	57463767	57463782	16	*	0.5497740025	5.17808828044624e-06	TRUE	mat
chr20	57463775	57463786	12	*	0.523518506666667	5.55097910718501e-06	TRUE	mat
chr20	57463783	57463899	117	*	0.518685424166667	7.76033666576966e-06	TRUE	mat
chr20	57463787	57463902	116	*	0.5003466675	3.47979094051326e-05	TRUE	mat
chr20	57463900	57463905	6	*	0.512199389166667	6.80360670326993e-05	TRUE	mat
chr20	57463903	57463924	22	*	0.577203376666667	2.03150399751198e-05	TRUE	mat
chr20	57463906	57463983	78	*	0.582237385	3.42691047169684e-06	TRUE	mat
chr20	57463925	57463990	66	*	0.49116268	2.79461128852352e-06	TRUE	mat
chr20	57463984	57463999	16	*	0.443166875	6.6049512424032e-05	TRUE	mat
chr20	57463991	57464001	11	*	0.426941503333333	0.000113650876483106	TRUE	mat
chr20	57464000	57464128	129	*	0.494749910833333	4.64112712978448e-05	TRUE	mat
chr20	57464002	57464570	569	*	0.511350044166667	1.60871730385814e-06	TRUE	mat
chr20	57464129	57464741	613	*	0.539040774166667	8.965293564515e-07	TRUE	mat
chr20	57464571	57464969	399	*	0.522824416666667	1.36259429735504e-06	TRUE	mat
chr20	57464742	57464972	231	*	0.551161058333334	2.77512630161382e-06	TRUE	mat
chr20	57464970	57465122	153	*	0.499053361666667	6.64995185814006e-05	TRUE	mat
chr20	57464973	57465124	152	*	0.474235378333334	1.64184646115788e-05	TRUE	mat
chr20	57465123	57465131	9	*	0.456177861666667	2.82698820636314e-06	TRUE	mat
chr20	57465125	57465138	14	*	0.515305725	4.2688030452316e-07	TRUE	mat
chr20	57465132	57465174	43	*	0.591707308333334	4.91820441265059e-09	TRUE	mat
chr20	57465139	57465438	300	*	0.489547946666667	8.90578756999876e-05	TRUE	mat
chr20	57465175	57465444	270	*	0.33144731	0.00355630960787369	TRUE	mat
chr20	62570072	62570695	624	*	0.314529341666667	0.000286801612838574	TRUE	mat
chr21	40757691	40757898	208	*	0.368037091666667	8.82366234065137e-07	TRUE	mat
chr21	40757750	40758207	458	*	0.347088741666667	9.80238110184752e-06	TRUE	mat
chr21	47715006	47716528	1523	*	0.34070725	0.0018494083018164	TRUE	mat
chr21	47716443	47717405	963	*	0.350947708333333	0.0218574199051164	TRUE	mat
chr22	31318240	31318372	133	*	0.323389283333333	0.000513064524174899	TRUE	mat
chr22	42077939	42078329	391	*	0.301532025	0.000387350542124982	TRUE	mat
chr22	42078365	42078566	202	*	0.319002883333333	9.47624443058165e-05	TRUE	mat
chr22	42078388	42078706	319	*	0.31934925	0.000127845166338991	TRUE	mat
chr22	42078567	42078722	156	*	0.318083016666667	3.71577860776822e-05	TRUE	mat

## Sheet: 450K 145 non overlapping region
seqnames	start	end	width	strand	gene
chr1	11561497	11561907	411	*	PTCHD2
chr1	38461540	38461879	340	*	FHL3
chr1	39249425	39254896	5472	*
chr1	40024971	40025414	444	*	PPIEL
chr1	42384310	42384473	164	*	HIVEP3
chr1	43814764	43815034	271	*	MPL
chr1	68512539	68513062	524	*	DIRAS3
chr1	68515788	68517655	1868	*	DIRAS3
chr1	102308808	102312670	3863	*	OLFM3
chr1	149147625	149148311	687	*	NBF23
chr1	149170064	149170351	288	*
chr1	152161237	152162506	1270	*
chr1	248100276	248101008	733	*	OR2L13
chr2	10637974	10638112	139	*
chr2	177015044	177016166	1123	*	HOXD4
chr2	207116070	207136183	20114	*	GRP1AS
chr2	239983744	239984104	361	*	HDAC4
chr2	241975140	241976243	1104	*	SNED1
chr3	27674461	27674613	153	*
chr3	39543515	39544191	677	*	MOBP
chr3	42727160	42727842	683	*	KLHL40
chr3	159557552	159558030	479	*	SCHIP1
chr3	196325238	196325551	314	*
chr4	6107021	6107648	628	*	JAKMIP1
chr4	89618324	89619235	912	*	NAP1L5
chr4	155702610	155703137	528	*	RBM46
chr4	165898707	165898925	219	*	TRIM61
chr4	189376670	189395409	18740	*	LOC401164
chr5	191600	191805	206	*	LRRC14B
chr5	1725285	1725822	538	*
chr5	42991495	42991861	367	*	AK05681
chr5	74908125	74908169	45	*	ANKDD1B
chr5	134363562	134363822	261	*	PITX1
chr5	140480597	140480871	275	*	PCDHB3
chr5	140719225	140719961	737	*	PCDHGA2
chr5	176797920	176798048	129	*	RGS14
chr6	3848904	3850105	1202	*	FAM50B
chr6	17016226	17016483	258	*
chr6	28945322	28945340	19	*
chr6	31240651	31241293	643	*	HLA-B
chr6	32116963	32117087	125	*	PRRT1
chr6	33049505	33050887	1383	*	HLA-DPB1
chr6	75953853	75954052	200	*	COX7A2
chr6	110736772	110737052	281	*	DDO
chr6	144328421	144329961	1541	*	PLAGL1
chr6	160023581	160023688	108	*
chr6	160426268	160427500	1233	*	IGF2R
chr6	170048424	170057476	9053	*	WDR27
chr7	2764129	2764245	117	*	GNA12
chr7	2802560	2802941	382	*	GNA12
chr7	4901750	4901797	48	*	RADIL
chr7	5183992	5184294	303	*	SNF890P
chr7	16890879	16891078	200	*
chr7	27127448	27128168	721	*
chr7	27134109	27134368	260	*	HOXA1
chr7	27137922	27138750	829	*	HOTAIRM1
chr7	50849639	50851502	1864	*	GRB10
chr7	94285642	94287241	1600	*	PEG10
chr7	130130122	130134487	4366	*	MEST
chr7	138348981	138349442	462	*	SVOPL
chr7	154862548	154863380	833	*	HTR5A
chr7	158750244	158751590	1347	*
chr8	1321333	1321726	394	*
chr8	37605552	37605977	426	*	ERLIN2
chr8	39172097	39172119	23	*	ADAM5
chr8	58055168	58056112	945	*
chr8	141108113	141114390	6278	*	TRAPPC9
chr9	98075146	98079447	4302	*	FANCC
chr9	129377854	129379318	1465	*	LMX1B
chr9	140311437	140312445	1009	*	EXD3
chr10	27702528	27703376	849	*	PTCHD3
chr10	43844651	43846704	2054	*
chr10	121578384	121578638	255	*	INPP5Fv2
chr11	1412397	1413314	918	*	BRSK2
chr11	1457119	1457345	227	*	BRSK2
chr11	2018724	2020100	1377	*	H19
chr11	2020286	2025905	5620	*
chr11	2153991	2154951	961	*	IGF2
chr11	2718307	2722339	4033	*	KCNQ1
chr11	116370272	116371390	1119	*
chr12	10095902	10096793	892	*
chr12	14926744	14926985	242	*	H2AFJ
chr12	47219737	47219796	60	*	SLC38A4
chr12	54385436	54385525	90	*	miR196A2
chr12	114107712	114107802	91	*
chr12	114885621	114886360	740	*
chr12	130821962	130822604	643	*	PIWIL1
chr12	130824015	130824327	313	*	PIWIL1
chr12	131488414	131488725	312	*	GPR133
chr12	132671062	132671671	610	*
chr12	133186923	133187173	251	*	LRCOL1
chr13	20716432	20716727	296	*	GJA3
chr13	48892551	48895969	3419	*	RB1
chr13	112984602	112985462	861	*
chr13	112986635	112989199	2565	*
chr14	101194145	101194747	603	*	DLK1
chr14	101290195	101294146	3952	*	MEG3
chr15	23807180	23810162	2983	*	miR4508
chr15	23891780	23894197	2418	*	MAGEL2
chr15	23931451	23932757	1307	*	NDN
chr15	24123705	24347062	223358	*
chr15	25018132	25018448	317	*
chr15	25031239	25093520	62282	*	SNRPN
chr15	25123287	25123730	444	*	SNRPN
chr15	25199713	25201731	2019	*	SNURF
chr15	45314789	45315296	508	*	SORD
chr15	69222592	69223017	426	*	NOX5
chr15	95870440	95870474	35	*	LOC400456
chr15	99408636	99409505	870	*	IGF1R
chr15	101093778	101093899	122	*	PRKXP1
chr16	3493133	3497279	4147	*	ZNF597
chr17	6558064	6559108	1045	*	miR4520A
chr17	37024020	37024168	149	*	TRNA
chr17	37093398	37123710	30313	*	FBXO47
chr17	70120182	70120410	229	*	SOX9
chr17	76871734	76876238	4505	*	TIMP2
chr18	29304111	29304481	371	*
chr18	77377119	77377588	470	*
chr19	1465556	1466161	606	*	APC2
chr19	4784940	4785373	434	*
chr19	11517079	11517259	181	*	RGL3
chr19	34112304	34112315	12	*	CHST8
chr19	48999042	49000896	1855	*	LMTK3
chr19	49001890	49002476	587	*	LMTK3
chr19	54040774	54041998	1225	*	ZNF331
chr19	54055365	54058084	2720	*	ZNF331
chr19	55476665	55478261	1597	*	NLRP2
chr19	57346735	57353127	6393	*	PEG3
chr19	58861502	58862062	561	*	A1BG
chr20	30134929	30138142	3214	*	HM13
chr20	36148457	36151002	2546	*	NNAT
chr20	42142236	42143501	1266	*	L3MBTL1
chr20	44782039	44784897	2859	*
chr20	44838776	44839186	411	*	CDH22
chr20	57414039	57420941	6903	*	GNAS
chr20	57425515	57428031	2517	*	GNAS
chr20	57429277	57431302	2026	*	GNAS
chr20	57463270	57465444	2175	*	GNAS
chr20	62570072	62570695	624	*	UCKL1
chr21	40757691	40758207	517	*	WRB
chr21	47715006	47717405	2400	*	YBEY
chr22	31318240	31318372	133	*	MORC-AS2
chr22	42077939	42078329	391	*	NHP2L1
chr22	42078365	42078722	358	*	NHP2L1
chr22	42548356	42548867	512	*

## Sheet: 450K 145 regions other tissues
seqnames	start	end	width	blood	brain	liver	muscle	kidney	common to x tissues	gene	present in intersection 145 vs 356
chr1	11561497	11561906	410	TRUE	TRUE	TRUE	TRUE	TRUE	5	PTCHD2	TRUE
chr1	40024971	40025413	443	TRUE	TRUE	TRUE	TRUE	TRUE	5	PPIEL	TRUE
chr1	68512539	68513061	523	TRUE	TRUE	TRUE	TRUE	TRUE	5	DIRAS3	TRUE
chr1	68515788	68517654	1867	TRUE	TRUE	TRUE	TRUE	TRUE	5	DIRAS3	TRUE
chr4	6107021	6107647	627	TRUE	TRUE	TRUE	TRUE	TRUE	5	JAKMIP1	TRUE
chr4	89618324	89619234	911	TRUE	TRUE	TRUE	TRUE	TRUE	5	NAP1L5	TRUE
chr5	140719225	140719960	736	TRUE	TRUE	TRUE	TRUE	TRUE	5	PCDHGA2	TRUE
chr6	3848904	3850104	1201	TRUE	TRUE	TRUE	TRUE	TRUE	5	FAM50B	TRUE
chr6	144328421	144329960	1540	TRUE	TRUE	TRUE	TRUE	TRUE	5	PLAGL1	TRUE
chr6	160426268	160427499	1232	TRUE	TRUE	TRUE	TRUE	TRUE	5	IGF2R	TRUE
chr7	50849639	50851501	1863	TRUE	TRUE	TRUE	TRUE	TRUE	5	GRB10	TRUE
chr7	94285642	94287240	1599	TRUE	TRUE	TRUE	TRUE	TRUE	5	PEG10	TRUE
chr7	130130122	130134486	4365	TRUE	TRUE	TRUE	TRUE	TRUE	5	MEST	TRUE
chr7	154862548	154863379	832	TRUE	TRUE	TRUE	TRUE	TRUE	5	HTR5A	TRUE
chr8	37605552	37605976	425	TRUE	TRUE	TRUE	TRUE	TRUE	5	ERLIN2	TRUE
chr8	141108113	141114389	6277	TRUE	TRUE	TRUE	TRUE	TRUE	5	TRAPPC9	TRUE
chr9	98075146	98079446	4301	TRUE	TRUE	TRUE	TRUE	TRUE	5	FANCC	TRUE
chr10	27702528	27703375	848	TRUE	TRUE	TRUE	TRUE	TRUE	5	PTCHD3	TRUE
chr11	2018724	2020099	1376	TRUE	TRUE	TRUE	TRUE	TRUE	5	H19	TRUE
chr11	2020286	2025904	5619	TRUE	TRUE	TRUE	TRUE	TRUE	5		TRUE
chr11	2153991	2154950	960	TRUE	TRUE	TRUE	TRUE	TRUE	5	IGF2	TRUE
chr11	2718307	2722338	4032	TRUE	TRUE	TRUE	TRUE	TRUE	5	KCNQ1	TRUE
chr13	48892551	48895968	3418	TRUE	TRUE	TRUE	TRUE	TRUE	5	RB1	TRUE
chr14	101290195	101294145	3951	TRUE	TRUE	TRUE	TRUE	TRUE	5	MEG3	TRUE
chr15	23891780	23894196	2417	TRUE	TRUE	TRUE	TRUE	TRUE	5	MAGEL2	TRUE
chr15	23931451	23932756	1306	TRUE	TRUE	TRUE	TRUE	TRUE	5	NDN	TRUE
chr15	25199713	25201730	2018	TRUE	TRUE	TRUE	TRUE	TRUE	5	SNURF	TRUE
chr15	69222592	69223016	425	TRUE	TRUE	TRUE	TRUE	TRUE	5	NOX5	TRUE
chr15	99408636	99409504	869	TRUE	TRUE	TRUE	TRUE	TRUE	5	IGF1R	TRUE
chr16	3493133	3497278	4146	TRUE	TRUE	TRUE	TRUE	TRUE	5	ZNF597	TRUE
chr18	77377119	77377587	469	TRUE	TRUE	TRUE	TRUE	TRUE	5		TRUE
chr19	54040774	54041997	1224	TRUE	TRUE	TRUE	TRUE	TRUE	5	ZNF331	TRUE
chr19	54055365	54058083	2719	TRUE	TRUE	TRUE	TRUE	TRUE	5	ZNF331	TRUE
chr19	57346735	57353126	6392	TRUE	TRUE	TRUE	TRUE	TRUE	5	PEG3	TRUE
chr20	30134929	30138141	3213	TRUE	TRUE	TRUE	TRUE	TRUE	5	HM13	TRUE
chr20	36148457	36151001	2545	TRUE	TRUE	TRUE	TRUE	TRUE	5	NNAT	TRUE
chr20	42142236	42143500	1265	TRUE	TRUE	TRUE	TRUE	TRUE	5	L3MBTL1	TRUE
chr20	57414039	57420940	6902	TRUE	TRUE	TRUE	TRUE	TRUE	5	GNAS	TRUE
chr20	57425515	57428030	2516	TRUE	TRUE	TRUE	TRUE	TRUE	5	GNAS	TRUE
chr20	57429277	57431301	2025	TRUE	TRUE	TRUE	TRUE	TRUE	5	GNAS	TRUE
chr20	57463270	57465443	2174	TRUE	TRUE	TRUE	TRUE	TRUE	5	GNAS	TRUE
chr21	40757691	40758206	516	TRUE	TRUE	TRUE	TRUE	TRUE	5	WRB	TRUE
chr22	42077939	42078328	390	TRUE	TRUE	TRUE	TRUE	TRUE	5	NHP2L1	TRUE
chr7	16890879	16891077	199	TRUE	TRUE	TRUE	FALSE	TRUE	4		TRUE
chr8	1321333	1321725	393	TRUE	TRUE	TRUE	FALSE	TRUE	4		TRUE
chr2	241975140	241976242	1103	TRUE	FALSE	FALSE	FALSE	FALSE	1	SNED1	TRUE
chr1	38461540	38461878	339	TRUE	TRUE	TRUE	TRUE	TRUE	5	FHL3	FALSE
chr1	39249425	39254895	5471	TRUE	TRUE	TRUE	TRUE	TRUE	5		FALSE
chr1	102308808	102312669	3862	TRUE	TRUE	TRUE	TRUE	TRUE	5	OLFM3	FALSE
chr1	149147625	149148310	686	TRUE	TRUE	TRUE	TRUE	TRUE	5	NBF23	FALSE
chr1	149170064	149170350	287	TRUE	TRUE	TRUE	TRUE	TRUE	5		FALSE
chr1	152161237	152162505	1269	TRUE	TRUE	TRUE	TRUE	TRUE	5		FALSE
chr1	248100276	248101007	732	TRUE	TRUE	TRUE	TRUE	TRUE	5	OR2L13	FALSE
chr2	10637974	10638111	138	TRUE	TRUE	TRUE	TRUE	TRUE	5		FALSE
chr2	177015044	177016165	1122	TRUE	TRUE	TRUE	TRUE	TRUE	5	HOXD4	FALSE
chr2	207116070	207136182	20113	TRUE	TRUE	TRUE	TRUE	TRUE	5	GRP1AS	FALSE
chr3	27674461	27674612	152	TRUE	TRUE	TRUE	TRUE	TRUE	5		FALSE
chr3	39543515	39544190	676	TRUE	TRUE	TRUE	TRUE	TRUE	5	MOBP	FALSE
chr3	42727160	42727841	682	TRUE	TRUE	TRUE	TRUE	TRUE	5	KLHL40	FALSE
chr3	159557552	159558029	478	TRUE	TRUE	TRUE	TRUE	TRUE	5	SCHIP1	FALSE
chr5	191600	191804	205	TRUE	TRUE	TRUE	TRUE	TRUE	5	LRRC14B	FALSE
chr5	1725285	1725821	537	TRUE	TRUE	TRUE	TRUE	TRUE	5		FALSE
chr5	42991495	42991860	366	TRUE	TRUE	TRUE	TRUE	TRUE	5	AK05681	FALSE
chr5	74908125	74908168	44	TRUE	TRUE	TRUE	TRUE	TRUE	5	ANKDD1B	FALSE
chr5	140480597	140480870	274	TRUE	TRUE	TRUE	TRUE	TRUE	5	PCDHB3	FALSE
chr5	176797920	176798047	128	TRUE	TRUE	TRUE	TRUE	TRUE	5	RGS14	FALSE
chr6	17016226	17016482	257	TRUE	TRUE	TRUE	TRUE	TRUE	5		FALSE
chr6	31240651	31241292	642	TRUE	TRUE	TRUE	TRUE	TRUE	5	HLA-B	FALSE
chr6	33049505	33050886	1382	TRUE	TRUE	TRUE	TRUE	TRUE	5	HLA-DPB1	FALSE
chr6	75953853	75954051	199	TRUE	TRUE	TRUE	TRUE	TRUE	5	COX7A2	FALSE
chr6	160023581	160023687	107	TRUE	TRUE	TRUE	TRUE	TRUE	5		FALSE
chr7	2802560	2802940	381	TRUE	TRUE	TRUE	TRUE	TRUE	5	GNA12	FALSE
chr7	4901750	4901796	47	TRUE	TRUE	TRUE	TRUE	TRUE	5	RADIL	FALSE
chr7	5183992	5184293	302	TRUE	TRUE	TRUE	TRUE	TRUE	5	SNF890P	FALSE
chr7	27127448	27128167	720	TRUE	TRUE	TRUE	TRUE	TRUE	5		FALSE
chr7	138348981	138349441	461	TRUE	TRUE	TRUE	TRUE	TRUE	5	SVOPL	FALSE
chr7	158750244	158751589	1346	TRUE	TRUE	TRUE	TRUE	TRUE	5		FALSE
chr8	39172097	39172118	22	TRUE	TRUE	TRUE	TRUE	TRUE	5	ADAM5	FALSE
chr8	58055168	58056111	944	TRUE	TRUE	TRUE	TRUE	TRUE	5		FALSE
chr9	140311437	140312444	1008	TRUE	TRUE	TRUE	TRUE	TRUE	5	EXD3	FALSE
chr10	43844651	43846703	2053	TRUE	TRUE	TRUE	TRUE	TRUE	5		FALSE
chr10	121578384	121578637	254	TRUE	TRUE	TRUE	TRUE	TRUE	5	INPP5Fv2	FALSE
chr11	1412397	1413313	917	TRUE	TRUE	TRUE	TRUE	TRUE	5	BRSK2	FALSE
chr11	1457119	1457344	226	TRUE	TRUE	TRUE	TRUE	TRUE	5	BRSK2	FALSE
chr11	116370272	116371389	1118	TRUE	TRUE	TRUE	TRUE	TRUE	5		FALSE
chr12	10095902	10096792	891	TRUE	TRUE	TRUE	TRUE	TRUE	5		FALSE
chr12	114107712	114107801	90	TRUE	TRUE	TRUE	TRUE	TRUE	5		FALSE
chr12	130821962	130822603	642	TRUE	TRUE	TRUE	TRUE	TRUE	5	PIWIL1	FALSE
chr12	130824015	130824326	312	TRUE	TRUE	TRUE	TRUE	TRUE	5	PIWIL1	FALSE
chr12	131488414	131488724	311	TRUE	TRUE	TRUE	TRUE	TRUE	5	GPR133	FALSE
chr12	133186923	133187172	250	TRUE	TRUE	TRUE	TRUE	TRUE	5	LRCOL1	FALSE
chr13	20716432	20716726	295	TRUE	TRUE	TRUE	TRUE	TRUE	5	GJA3	FALSE
chr13	112984602	112985461	860	TRUE	TRUE	TRUE	TRUE	TRUE	5		FALSE
chr13	112986635	112989198	2564	TRUE	TRUE	TRUE	TRUE	TRUE	5		FALSE
chr14	101194145	101194746	602	TRUE	TRUE	TRUE	TRUE	TRUE	5	DLK1	FALSE
chr15	23807180	23810161	2982	TRUE	TRUE	TRUE	TRUE	TRUE	5	miR4508	FALSE
chr15	24123705	24347061	223357	TRUE	TRUE	TRUE	TRUE	TRUE	5		FALSE
chr15	25018132	25018447	316	TRUE	TRUE	TRUE	TRUE	TRUE	5		FALSE
chr15	25031239	25093519	62281	TRUE	TRUE	TRUE	TRUE	TRUE	5	SNRPN	FALSE
chr15	25123287	25123729	443	TRUE	TRUE	TRUE	TRUE	TRUE	5	SNRPN	FALSE
chr15	45314789	45315295	507	TRUE	TRUE	TRUE	TRUE	TRUE	5	SORD	FALSE
chr15	95870440	95870473	34	TRUE	TRUE	TRUE	TRUE	TRUE	5	LOC400456	FALSE
chr17	6558064	6559107	1044	TRUE	TRUE	TRUE	TRUE	TRUE	5	miR4520A	FALSE
chr17	37024020	37024167	148	TRUE	TRUE	TRUE	TRUE	TRUE	5	TRNA	FALSE
chr17	37093398	37123709	30312	TRUE	TRUE	TRUE	TRUE	TRUE	5	FBXO47	FALSE
chr18	29304111	29304480	370	TRUE	TRUE	TRUE	TRUE	TRUE	5		FALSE
chr19	1465556	1466160	605	TRUE	TRUE	TRUE	TRUE	TRUE	5	APC2	FALSE
chr19	4784940	4785372	433	TRUE	TRUE	TRUE	TRUE	TRUE	5		FALSE
chr19	11517079	11517258	180	TRUE	TRUE	TRUE	TRUE	TRUE	5	RGL3	FALSE
chr19	34112304	34112314	11	TRUE	TRUE	TRUE	TRUE	TRUE	5	CHST8	FALSE
chr19	48999042	49000895	1854	TRUE	TRUE	TRUE	TRUE	TRUE	5	LMTK3	FALSE
chr19	55476665	55478260	1596	TRUE	TRUE	TRUE	TRUE	TRUE	5	NLRP2	FALSE
chr20	44782039	44784896	2858	TRUE	TRUE	TRUE	TRUE	TRUE	5		FALSE
chr20	44838776	44839185	410	TRUE	TRUE	TRUE	TRUE	TRUE	5	CDH22	FALSE
chr20	62570072	62570694	623	TRUE	TRUE	TRUE	TRUE	TRUE	5	UCKL1	FALSE
chr21	47715006	47717404	2399	TRUE	TRUE	TRUE	TRUE	TRUE	5	YBEY	FALSE
chr22	31318240	31318371	132	TRUE	TRUE	TRUE	TRUE	TRUE	5	MORC-AS2	FALSE
chr22	42078365	42078721	357	TRUE	TRUE	TRUE	TRUE	TRUE	5	NHP2L1	FALSE
chr22	42548356	42548866	511	TRUE	TRUE	TRUE	TRUE	TRUE	5		FALSE
chr1	43814764	43815033	270	TRUE	TRUE	TRUE	TRUE	FALSE	4	MPL	FALSE
chr2	239983744	239984103	360	TRUE	TRUE	TRUE	TRUE	FALSE	4	HDAC4	FALSE
chr3	196325238	196325550	313	TRUE	FALSE	TRUE	TRUE	TRUE	4		FALSE
chr4	155702610	155703136	527	TRUE	FALSE	TRUE	TRUE	TRUE	4	RBM46	FALSE
chr7	27134109	27134367	259	TRUE	FALSE	TRUE	TRUE	TRUE	4	HOXA1	FALSE
chr17	70120182	70120409	228	TRUE	FALSE	TRUE	TRUE	TRUE	4	SOX9	FALSE
chr17	76871734	76876237	4504	TRUE	FALSE	TRUE	TRUE	TRUE	4	TIMP2	FALSE
chr19	49001890	49002475	586	TRUE	FALSE	TRUE	TRUE	TRUE	4	LMTK3	FALSE
chr1	42384310	42384472	163	TRUE	FALSE	TRUE	FALSE	TRUE	3	HIVEP3	FALSE
chr4	165898707	165898924	218	TRUE	TRUE	TRUE	FALSE	FALSE	3	TRIM61	FALSE
chr5	134363562	134363821	260	TRUE	FALSE	FALSE	TRUE	TRUE	3	PITX1	FALSE
chr6	28945322	28945339	18	TRUE	FALSE	FALSE	TRUE	TRUE	3		FALSE
chr6	110736772	110737051	280	TRUE	TRUE	TRUE	FALSE	FALSE	3	DDO	FALSE
chr6	170048424	170057475	9052	TRUE	TRUE	FALSE	TRUE	FALSE	3	WDR27	FALSE
chr7	27137922	27138749	828	TRUE	FALSE	TRUE	TRUE	FALSE	3	HOTAIRM1	FALSE
chr9	129377854	129379317	1464	TRUE	FALSE	TRUE	TRUE	FALSE	3	LMX1B	FALSE
chr12	14926744	14926984	241	TRUE	TRUE	TRUE	FALSE	FALSE	3	H2AFJ	FALSE
chr12	54385436	54385524	89	TRUE	FALSE	TRUE	TRUE	FALSE	3	miR196A2	FALSE
chr12	132671062	132671670	609	TRUE	FALSE	TRUE	FALSE	TRUE	3		FALSE
chr4	189376670	189395408	18739	TRUE	FALSE	FALSE	TRUE	FALSE	2	LOC401164	FALSE
chr7	2764129	2764244	116	TRUE	FALSE	FALSE	FALSE	TRUE	2	GNA12	FALSE
chr12	114885621	114886359	739	TRUE	FALSE	TRUE	FALSE	FALSE	2		FALSE
chr6	32116963	32117086	124	TRUE	FALSE	FALSE	FALSE	FALSE	1	PRRT1	FALSE
chr12	47219737	47219795	59	TRUE	FALSE	FALSE	FALSE	FALSE	1	SLC38A4	FALSE
chr15	101093778	101093898	121	TRUE	FALSE	FALSE	FALSE	FALSE	1	PRKXP1	FALSE
chr19	58861502	58862061	560	TRUE	FALSE	FALSE	FALSE	FALSE	1	A1BG	FALSE

## Sheet: WGBS  63 common windows
seqnames	start	end	width	blood	sd,blood	Pupd	sd,Pupd	Mupd	sd,Mupd	delta UPD	MAT	PAT	gene
chr1	40024086	40025458	1373	0.718242	0.0378486	0.512949	0.06868	0.864187	0.029801	0.351238	TRUE	FALSE	LOC728448
chr1	68515566	68516595	1030	0.600092	0.065063	0.330957	0.0901491	0.837105	0.056519	0.506148	TRUE	FALSE	DIRAS3
chr1	247681102	247681738	637	0.674286	0.119859	0.652555	0.143743	0.770774	0.101643	0.118219	FALSE	FALSE	GCSAML
chr2	25383871	25384390	520	0.745285	0.196609	0.708013	0.171653	0.716234	0.190143	0.00822191	FALSE	FALSE	POMC
chr2	39470725	39471232	508	0.620791	0.100916	0.583229	0.0992758	0.858876	0.0579957	0.275648	TRUE	FALSE	MAP4K3
chr2	91776884	91777584	701	0.595558	0.114007	0.55319	0.113424	0.674004	0.105501	0.120814	FALSE	FALSE
chr2	91910773	91911857	1085	0.5497	NA	0.542368	NA	0.549396	NA	0.00702865	FALSE	FALSE
chr2	113992395	113994000	1606	0.785987	0.0460402	0.875566	0.0468233	0.853008	0.0426767	-0.0225578	FALSE	FALSE	PAX8
chr2	129659143	129660361	1219	0.542719	0.14332	0.573653	0.159666	0.661328	0.146334	0.087675	FALSE	FALSE
chr2	132481459	132482773	1315	0.678613	0.112726	0.71591	0.0649075	0.480103	0.158781	-0.235808	FALSE	FALSE	C2orf27A
chr3	49755984	49756603	620	0.373977	0.286696	0.414046	0.323926	0.42507	0.343039	0.0110234	FALSE	FALSE	AMIGO3
chr3	75444789	75445735	947	0.724725	0.112249	0.635399	0.0644989	0.677104	0.0402318	0.0417056	FALSE	FALSE
chr3	75718119	75718554	436	NA	NA	NA	NA	NA	NA	#VALUE!	#VALUE!	#VALUE!	FLJ20518
chr4	53211	53685	475	0.636516	0.118213	0.589063	0.114298	0.651794	0.128827	0.0627306	FALSE	FALSE	ZNF595
chr4	6107124	6107649	526	0.657411	0.128881	0.462448	0.138833	0.862677	0.0544071	0.400229	TRUE	FALSE	JAKMIP1
chr4	63680944	63684220	3277	0.665854	NA	0.629579	NA	0.576874	NA	-0.0527049	FALSE	FALSE
chr5	1856625	1857590	966	0.704507	0.0461409	0.687107	0.0556609	0.812489	0.0657936	0.125382	FALSE	FALSE
chr5	140182627	140182967	341	0.657016	0.184508	0.677282	0.0944892	0.615434	0.0754814	-0.0618478	FALSE	FALSE	PCDHA2
chr5	140215404	140216231	828	0.79175	0.0735174	0.737938	0.0524554	0.703041	0.0681078	-0.0348974	FALSE	FALSE	PCDHA6
chr5	176273711	176274236	526	0.542083	NA	0.556728	NA	0.803241	NA	0.246513	FALSE	FALSE	UNC5A
chr6	3848634	3850373	1740	0.605059	0.0953897	0.372583	0.186932	0.8263	0.05216	0.453717	TRUE	FALSE	FAM50B
chr6	32063534	32064192	659	0.57102	0.119663	0.545705	0.150908	0.61623	0.172102	0.0705246	FALSE	FALSE	TNXB
chr6	110720729	110721394	666	0.655949	0.0438475	0.680548	0.0591576	0.509702	0.0926724	-0.170845	FALSE	FALSE	DDO
chr6	112688145	112688745	601	0.550266	0.0557563	0.402672	0.0744451	0.489395	0.071196	0.0867222	FALSE	FALSE	RFPL4B
chr6	144328201	144329909	1709	0.592013	0.0703716	0.328543	0.0880654	0.819882	0.0759286	0.491339	TRUE	FALSE	PLAGL1
chr7	50849986	50851504	1519	0.662091	0.198001	0.466566	0.363732	0.875786	0.0296914	0.40922	TRUE	FALSE	GRB10
chr7	94285559	94288405	2847	0.571184	0.0846592	0.273757	0.0678144	0.819019	0.0822898	0.545262	TRUE	FALSE	PEG10
chr7	101943819	101944479	661	0.862759	0.0669408	0.827933	0.0478626	0.825766	0.0547623	-0.00216697	FALSE	FALSE	SH2B2
chr7	130130645	130134488	3844	0.598673	0.0715607	0.313866	0.098826	0.84436	0.0553316	0.530493	TRUE	FALSE	MEST
chr8	37604951	37606110	1160	0.642839	0.0722217	0.406622	0.136761	0.694957	0.10002	0.288335	TRUE	FALSE	LOC728024
chr8	141108113	141110747	2635	0.683602	0.0553172	0.377011	0.157039	0.891294	0.0177412	0.514283	TRUE	FALSE	TRAPPC9
chr9	65602386	65602952	567	0.581096	NA	0.535309	NA	0.5745	NA	0.0391906	FALSE	FALSE
chr9	68410506	68411816	1311	NA	NA	NA	NA	NA	NA	#VALUE!	#VALUE!	#VALUE!	AK308561
chr10	27702227	27703374	1148	0.673171	0.115198	0.523494	0.131	0.834365	0.0936697	0.310871	TRUE	FALSE	PTCHD3
chr10	135492412	135492750	339	NA	NA	NA	NA	NA	NA	#VALUE!	#VALUE!	#VALUE!	DUX4L3
chr10	135495722	135496060	339	NA	NA	NA	NA	NA	NA	#VALUE!	#VALUE!	#VALUE!	DUX4L3
chr11	2019116	2024681	5566	0.621927	0.0690222	0.843184	0.0408162	0.423463	0.13633	-0.41972	FALSE	TRUE	H19
chr11	2719463	2720727	1265	0.634157	0.0912257	0.299243	0.0154889	0.864345	0.0245667	0.565102	TRUE	FALSE	KCNQ1
chr11	2720729	2721394	666	0.562663	0.0377536	0.262897	0.0689116	0.790536	0.0824984	0.52764	TRUE	FALSE	KCNQ1OT1
chr11	2721409	2722714	1306	0.682187	0.154789	0.473863	0.274444	0.854913	0.0599817	0.38105	TRUE	FALSE	KCNQ1OT1
chr12	113515069	113516021	953	0.498253	0.114406	0.479284	0.122383	0.567897	0.124874	0.0886126	FALSE	FALSE	DTX1
chr12	131783781	131784475	695	0.117473	NA	0.113363	NA	0.117425	NA	0.00406199	FALSE	FALSE	BC042649
chr13	19183064	19183913	850	0.570686	0.158034	0.383354	0.20568	0.400097	0.246327	0.0167427	FALSE	FALSE
chr13	110521734	110522514	781	0.581153	0.0684257	0.46254	0.114513	0.477199	0.15462	0.0146591	FALSE	FALSE
chr14	101291905	101293674	1770	0.598353	0.0524067	0.846123	0.0327319	0.341703	0.0710303	-0.50442	FALSE	TRUE	MEG3
chr15	25199164	25201031	1868	0.689006	0.115187	0.469975	0.305348	0.879325	0.0317499	0.40935	TRUE	FALSE	SNRUF
chr15	99408273	99409949	1677	0.627551	0.067779	0.421368	0.140169	0.76885	0.0904139	0.347483	TRUE	FALSE	IGF1R
chr16	867208	868000	793	0.617724	NA	0.406839	NA	0.889067	NA	0.482228	TRUE	FALSE
chr16	3304305	3304831	527	0.736819	0.0581445	0.619843	0.0451684	0.72863	0.0260138	0.108788	FALSE	FALSE	MEFV
chr16	3492868	3494255	1388	0.551749	0.0703066	0.701905	0.132152	0.265689	0.0779864	-0.436217	FALSE	TRUE	NAT15
chr18	77279792	77281119	1328	0.523338	0.0743728	0.428814	0.127415	0.620281	0.081169	0.191467	FALSE	FALSE	NFATC1
chr18	77376636	77377482	847	0.615747	0.243139	0.602701	0.327683	0.831476	0.128829	0.228775	FALSE	FALSE
chr19	54040465	54042212	1748	0.512415	0.0970813	0.248073	0.11617	0.764876	0.0796869	0.516803	TRUE	FALSE	ZNF331
chr19	54056992	54058424	1433	0.579977	0.0727756	0.28719	0.0558598	0.823849	0.0697213	0.53666	TRUE	FALSE	ZNF331
chr19	57348394	57352545	4152	0.619734	0.0669076	0.328047	0.0900602	0.850061	0.0578475	0.522014	TRUE	FALSE	PEG3
chr20	3731970	3732626	657	0.89573	NA	0.927801	NA	0.913463	NA	-0.0143375	FALSE	FALSE	HSPA12B
chr20	42142224	42144440	2217	0.621208	0.0939628	0.333045	0.174477	0.84239	0.0432023	0.509345	TRUE	FALSE	L3MBTL
chr20	57413997	57419519	5523	0.591897	0.07189	0.839888	0.0452497	0.378105	0.108818	-0.461784	FALSE	TRUE	GNASAS
chr20	57425365	57428032	2668	0.552483	0.0860907	0.290799	0.0991474	0.768379	0.105405	0.477581	TRUE	FALSE	GNAS
chr20	57428905	57431884	2980	0.576535	0.0342604	0.277846	0.0844154	0.840631	0.0278741	0.562785	TRUE	FALSE	GNAS
chr20	57464317	57465326	1010	0.550172	0.0850087	0.26598	0.0612794	0.795569	0.105641	0.529589	TRUE	FALSE	GNAS
chr21	40757331	40758325	995	0.651219	0.153124	0.530448	0.210799	0.810128	0.122906	0.279681	TRUE	FALSE	WRB
chr21	47581141	47581909	769	0.720456	0.0171397	0.658051	0.0297065	0.914433	0.00204248	0.256382	TRUE	FALSE	SPATC1L

## Sheet: WGBS 356 partially methylated 
seqnames	start	end	width	strand	Score
chr1	1372066	1372627	562	*	1
chr1	3633771	3634190	420	*	2
chr1	11561713	11562087	375	*	3
chr1	17198677	17199036	360	*	4
chr1	40024612	40025458	847	*	5
chr1	41889229	41889578	350	*	6
chr1	55246867	55247257	391	*	7
chr1	68515566	68516595	1030	*	8
chr1	68517142	68517454	313	*	9
chr1	86968748	86969703	956	*	10
chr1	88149522	88151057	1536	*	11
chr1	146367964	146368264	301	*	12
chr1	146368298	146368433	136	*	13
chr1	149288205	149288729	525	*	14
chr1	151103976	151104360	385	*	15
chr1	205818740	205819209	470	*	16
chr1	227746203	227746649	447	*	17
chr1	227748104	227748194	91	*	18
chr1	228400120	228400181	62	*	19
chr1	228749090	228749334	245	*	20
chr1	228750789	228751027	239	*	21
chr1	228757286	228757486	201	*	22
chr1	228757677	228757725	49	*	23
chr1	228758709	228758931	223	*	24
chr1	228765086	228765303	218	*	25
chr1	228769411	228769677	267	*	26
chr1	228769856	228769885	30	*	27
chr1	228773317	228773421	105	*	28
chr1	228773514	228773575	62	*	29
chr1	228773638	228774046	409	*	30
chr1	228776152	228776449	298	*	31
chr1	228780996	228781188	193	*	32
chr1	228782073	228782261	189	*	33
chr1	234491940	234493523	1584	*	34
chr1	245851226	245851400	175	*	35
chr1	247681196	247681672	477	*	36
chr2	732382	732443	62	*	37
chr2	1816878	1817516	639	*	38
chr2	16153586	16154295	710	*	39
chr2	25383908	25384267	360	*	40
chr2	39470772	39471232	461	*	41
chr2	66664936	66665009	74	*	42
chr2	66667887	66668102	216	*	43
chr2	66672357	66672783	427	*	44
chr2	91776995	91777569	575	*	45
chr2	91910773	91911622	850	*	46
chr2	95537372	95537617	246	*	47
chr2	98340662	98340922	261	*	48
chr2	105853269	105853780	512	*	49
chr2	113992827	113993645	819	*	50
chr2	113993690	113993947	258	*	51
chr2	118617578	118618004	427	*	52
chr2	121776238	121776616	379	*	53
chr2	129659143	129659754	612	*	54
chr2	131354524	131355137	614	*	55
chr2	132481459	132482772	1314	*	56
chr2	132587604	132587857	254	*	57
chr2	150176951	150177357	407	*	58
chr2	202900822	202901680	859	*	59
chr2	231855620	231856011	392	*	60
chr2	232530871	232531845	975	*	61
chr2	241975140	241975140	1	*	62
chr2	242989336	242989488	153	*	63
chr2	242989579	242989590	12	*	64
chr3	44622687	44622822	136	*	65
chr3	49755989	49756355	367	*	66
chr3	75444874	75445438	565	*	67
chr3	75718127	75718553	427	*	68
chr3	138763358	138763474	117	*	69
chr3	138763560	138763620	61	*	70
chr4	53233	53685	453	*	71
chr4	1522331	1522635	305	*	72
chr4	6107124	6107490	367	*	73
chr4	8583064	8583162	99	*	74
chr4	63682028	63683140	1113	*	75
chr4	89618530	89619038	509	*	76
chr4	190989795	190989829	35	*	77
chr4	190990941	190991263	323	*	78
chr5	561877	562116	240	*	79
chr5	565476	565888	413	*	80
chr5	1856726	1857542	817	*	81
chr5	2334749	2335107	359	*	82
chr5	101119036	101119767	732	*	83
chr5	135415892	135416529	638	*	84
chr5	140052065	140052259	195	*	85
chr5	140166370	140167365	996	*	86
chr5	140182296	140182557	262	*	87
chr5	140182627	140182954	328	*	88
chr5	140208681	140209014	334	*	89
chr5	140209137	140209360	224	*	90
chr5	140209488	140209490	3	*	91
chr5	140215413	140215652	240	*	92
chr5	140221869	140222253	385	*	93
chr5	140228697	140229338	642	*	94
chr5	140229358	140229393	36	*	95
chr5	140229529	140229570	42	*	96
chr5	140229894	140230291	398	*	97
chr5	140237172	140237445	274	*	98
chr5	140242159	140242952	794	*	99
chr5	140250148	140250862	715	*	100
chr5	140255779	140256507	729	*	101
chr5	140257048	140257531	484	*	102
chr5	140262588	140263214	627	*	103
chr5	140263220	140263407	188	*	104
chr5	140263694	140263971	278	*	105
chr5	140475976	140476112	137	*	106
chr5	140517040	140517179	140	*	107
chr5	140590067	140590335	269	*	108
chr5	140626633	140626944	312	*	109
chr5	140712137	140712403	267	*	110
chr5	140718798	140719273	476	*	111
chr5	140768999	140769592	594	*	112
chr5	140773888	140774316	429	*	113
chr5	140807166	140807552	387	*	114
chr5	156277331	156277656	326	*	115
chr5	176273759	176274175	417	*	116
chr6	3023331	3024534	1204	*	117
chr6	3848863	3849577	715	*	118
chr6	3849585	3850337	753	*	119
chr6	22146783	22147248	466	*	120
chr6	27620891	27621396	506	*	121
chr6	27831824	27832225	402	*	122
chr6	32063571	32064000	430	*	123
chr6	32847548	32847836	289	*	124
chr6	35754694	35754955	262	*	125
chr6	41528224	41528781	558	*	126
chr6	88757425	88757703	279	*	127
chr6	110721060	110721393	334	*	128
chr6	112688278	112688745	468	*	129
chr6	144328208	144329239	1032	*	130
chr6	144329246	144329909	664	*	131
chr6	160427128	160427188	61	*	132
chr6	170574556	170575074	519	*	133
chr6	170589429	170589870	442	*	134
chr7	16890636	16891079	444	*	135
chr7	23530284	23530945	662	*	136
chr7	32358448	32358545	98	*	137
chr7	50849206	50849831	626	*	138
chr7	50850197	50850299	103	*	139
chr7	50850311	50850376	66	*	140
chr7	50850413	50851488	1076	*	141
chr7	55072963	55073312	350	*	142
chr7	57472320	57472499	180	*	143
chr7	57484253	57484424	172	*	144
chr7	61804381	61808087	3707	*	145
chr7	63642726	63643171	446	*	146
chr7	64402890	64403375	486	*	147
chr7	94285559	94287422	1864	*	148
chr7	101943950	101944263	314	*	149
chr7	102251260	102251714	455	*	150
chr7	130130645	130131990	1346	*	151
chr7	130132150	130133841	1692	*	152
chr7	150147442	150148183	742	*	153
chr7	150901477	150901734	258	*	154
chr7	154862774	154863381	608	*	155
chr7	155599077	155599280	204	*	156
chr7	157462744	157463328	585	*	157
chr7	158766272	158766413	142	*	158
chr7	158905077	158905367	291	*	159
chr8	1320979	1321525	547	*	160
chr8	37604992	37606109	1118	*	161
chr8	47528831	47529091	261	*	162
chr8	48675647	48676072	426	*	163
chr8	49343031	49343887	857	*	164
chr8	57030214	57030532	319	*	165
chr8	58192676	58193091	416	*	166
chr8	105379662	105380007	346	*	167
chr8	141108340	141110568	2229	*	168
chr8	143626032	143626534	503	*	169
chr8	144809991	144810034	44	*	170
chr8	145193326	145194863	1538	*	171
chr8	145537426	145537455	30	*	172
chr9	38526717	38526948	232	*	173
chr9	41222119	41222602	484	*	174
chr9	44119408	44119759	352	*	175
chr9	65602386	65602935	550	*	176
chr9	68410928	68411272	345	*	177
chr9	98075400	98075744	345	*	178
chr9	115823193	115823326	134	*	179
chr9	130616273	130616917	645	*	180
chr9	131155233	131155544	312	*	181
chr9	138937893	138938109	217	*	182
chr9	139249679	139249931	253	*	183
chr9	139664855	139664919	65	*	184
chr9	139740052	139740291	240	*	185
chr9	139740331	139740379	49	*	186
chr9	139889312	139889507	196	*	187
chr9	139917517	139917818	302	*	188
chr10	530655	531153	499	*	189
chr10	21789233	21789474	242	*	190
chr10	27702459	27703290	832	*	191
chr10	49674625	49674762	138	*	192
chr10	99338019	99338335	317	*	193
chr10	101599920	101600006	87	*	194
chr10	121578108	121578215	108	*	195
chr10	123355467	123355513	47	*	196
chr10	132099067	132099438	372	*	197
chr10	134778477	134779196	720	*	198
chr10	135278738	135278884	147	*	199
chr10	135383090	135383453	364	*	200
chr10	135485068	135485346	279	*	201
chr10	135492440	135492741	302	*	202
chr10	135495722	135496060	339	*	203
chr11	425042	425182	141	*	204
chr11	1577872	1577889	18	*	205
chr11	2019655	2020114	460	*	206
chr11	2020729	2020894	166	*	207
chr11	2021207	2024349	3143	*	208
chr11	2154333	2155111	779	*	209
chr11	2719463	2720701	1239	*	210
chr11	2720918	2721384	467	*	211
chr11	2721409	2722391	983	*	212
chr11	6340561	6340849	289	*	213
chr11	18477280	18477553	274	*	214
chr11	47611975	47612121	147	*	215
chr11	65123166	65123573	408	*	216
chr11	65352770	65352853	84	*	217
chr11	78614206	78614708	503	*	218
chr11	94278656	94278725	70	*	219
chr11	118842319	118842651	333	*	220
chr11	133789031	133789942	912	*	221
chr11	134632242	134632599	358	*	222
chr12	213856	214129	274	*	223
chr12	6184106	6184468	363	*	224
chr12	43965767	43965985	219	*	225
chr12	56329296	56329910	615	*	226
chr12	96235761	96236221	461	*	227
chr12	109219800	109221103	1304	*	228
chr12	113515242	113515890	649	*	229
chr12	124864622	124865260	639	*	230
chr12	131783829	131784104	276	*	231
chr13	19174213	19174552	340	*	232
chr13	19183171	19183357	187	*	233
chr13	19183396	19183479	84	*	234
chr13	48892148	48894686	2539	*	235
chr13	81229062	81229152	91	*	236
chr13	110521819	110522346	528	*	237
chr14	20136732	20137022	291	*	238
chr14	34268911	34269203	293	*	239
chr14	34269924	34270854	931	*	240
chr14	101144141	101145037	897	*	241
chr14	101291905	101293652	1748	*	242
chr14	101293841	101294280	440	*	243
chr14	105812810	105813187	378	*	244
chr14	106180958	106181989	1032	*	245
chr15	21995528	21995827	300	*	246
chr15	23454831	23455203	373	*	247
chr15	23892356	23892969	614	*	248
chr15	23931590	23931920	331	*	249
chr15	25200061	25200653	593	*	250
chr15	26915310	26915715	406	*	251
chr15	27139194	27139652	459	*	252
chr15	32567993	32568614	622	*	253
chr15	65688959	65689213	255	*	254
chr15	69222632	69222760	129	*	255
chr15	69222774	69222903	130	*	256
chr15	76484144	76484437	294	*	257
chr15	99408406	99409471	1066	*	258
chr16	867415	868000	586	*	259
chr16	1583391	1584111	721	*	260
chr16	3304352	3304750	399	*	261
chr16	3481801	3482387	587	*	262
chr16	3493290	3493483	194	*	263
chr16	3493504	3494255	752	*	264
chr16	15083516	15083661	146	*	265
chr16	28758411	28758692	282	*	266
chr16	31439290	31439349	60	*	267
chr16	32769136	32769522	387	*	268
chr16	32822669	32822861	193	*	269
chr16	32823038	32823078	41	*	270
chr16	33070871	33071036	166	*	271
chr16	33942472	33942843	372	*	272
chr16	67688395	67688732	338	*	273
chr16	88947756	88948163	408	*	274
chr16	89002930	89003281	352	*	275
chr16	89003473	89003544	72	*	276
chr17	942697	942766	70	*	277
chr17	943067	943395	329	*	278
chr17	4804161	4804494	334	*	279
chr17	20799434	20799867	434	*	280
chr17	34616215	34617813	1599	*	281
chr17	36718186	36718500	315	*	282
chr17	36719802	36720451	650	*	283
chr17	39203191	39203441	251	*	284
chr17	48858636	48858907	272	*	285
chr17	55434177	55434964	788	*	286
chr17	75315081	75315828	748	*	287
chr18	12912128	12912293	166	*	288
chr18	13641473	13642037	565	*	289
chr18	34853748	34854425	678	*	290
chr18	76674399	76674796	398	*	291
chr18	77279903	77280649	747	*	292
chr18	77376702	77377158	457	*	293
chr18	77377230	77377449	220	*	294
chr18	77918027	77918363	337	*	295
chr19	381050	382812	1763	*	296
chr19	1213879	1214504	626	*	297
chr19	1395152	1395291	140	*	298
chr19	1908016	1908312	297	*	299
chr19	3671013	3671126	114	*	300
chr19	4542798	4543311	514	*	301
chr19	11275175	11276239	1065	*	302
chr19	12983737	12984399	663	*	303
chr19	13135715	13136168	454	*	304
chr19	13318354	13318516	163	*	305
chr19	16999668	17000202	535	*	306
chr19	18979722	18979763	42	*	307
chr19	19625106	19625421	316	*	308
chr19	22700152	22700884	733	*	309
chr19	38039385	38039876	492	*	310
chr19	39798827	39799015	189	*	311
chr19	40421376	40421527	152	*	312
chr19	45737559	45737624	66	*	313
chr19	46915333	46915573	241	*	314
chr19	49001223	49001830	608	*	315
chr19	49891304	49891472	169	*	316
chr19	50962142	50962304	163	*	317
chr19	54040510	54041106	597	*	318
chr19	54057086	54058349	1264	*	319
chr19	54932136	54932393	258	*	320
chr19	57348529	57351004	2476	*	321
chr19	57351011	57352545	1535	*	322
chr19	58867828	58868215	388	*	323
chr20	3732230	3732523	294	*	324
chr20	11939533	11940278	746	*	325
chr20	29524186	29524482	297	*	326
chr20	30071967	30072399	433	*	327
chr20	30134878	30136213	1336	*	328
chr20	36149618	36149938	321	*	329
chr20	42142236	42144440	2205	*	330
chr20	42788644	42788797	154	*	331
chr20	43378780	43379095	316	*	332
chr20	43932987	43933145	159	*	333
chr20	50109138	50109523	386	*	334
chr20	57414039	57415195	1157	*	335
chr20	57415359	57418832	3474	*	336
chr20	57425758	57426859	1102	*	337
chr20	57427495	57427642	148	*	338
chr20	57429067	57431646	2580	*	339
chr20	57463909	57464256	348	*	340
chr20	57464437	57465007	571	*	341
chr20	59542549	59542742	194	*	342
chr20	62318360	62318682	323	*	343
chr21	32546192	32546958	767	*	344
chr21	40757336	40758323	988	*	345
chr21	45559835	45560619	785	*	346
chr21	46876119	46876269	151	*	347
chr21	47581196	47581825	630	*	348
chr22	20458914	20459368	455	*	349
chr22	20784649	20784898	250	*	350
chr22	22472189	22472222	34	*	351
chr22	28193634	28193699	66	*	352
chr22	42078080	42078689	610	*	353
chr22	42736819	42737421	603	*	354
chr22	44991700	44992372	673	*	355
chr22	50985622	50985942	321	*	356

## Sheet: intersection 145 VS 356 
seqnames	start	end	width	strand	gene
chr1	11561713	11561907	195	*	PTCHD2
chr1	40024971	40025414	444	*	PPIEL
chr1	68515788	68516595	808	*	DIRAS3
chr1	68517142	68517454	313	*	DIRAS3
chr10	27702528	27703290	763	*	PTCHD3
chr11	2019655	2020100	446	*	H19
chr11	2020729	2020894	166	*	h19
chr11	2021207	2024349	3143	*	h19
chr11	2154333	2154951	619	*	IGF2
chr11	2719463	2720701	1239	*	KCNQ1
chr11	2720918	2721384	467	*	KCNQ1
chr11	2721409	2722339	931	*	KCNQ1
chr13	48892551	48894686	2136	*	RB1
chr14	101291905	101293652	1748	*	MEG3
chr14	101293841	101294146	306	*	MEG3
chr15	23892356	23892969	614	*	MAGEL2
chr15	23931590	23931920	331	*	NDN
chr15	25200061	25200653	593	*	SNRPN
chr15	69222632	69222760	129	*	NOX5
chr15	69222774	69222903	130	*	NOX5
chr15	99408636	99409471	836	*	IGF1R
chr16	3493290	3493483	194	*	ZNF597
chr16	3493504	3494255	752	*	NAA60
chr18	77377119	77377158	40	*
chr18	77377230	77377449	220	*
chr19	54040774	54041106	333	*	ZNF331
chr19	54057086	54058084	999	*	ZNF331
chr19	57348529	57351004	2476	*	PEG3
chr19	57351011	57352545	1535	*	PEG3
chr2	241975140	241975140	1	*	SNED1
chr20	30134929	30136213	1285	*	HM13
chr20	36149618	36149938	321	*	NNAT
chr20	42142236	42143501	1266	*	L3MBTL1
chr20	57414039	57415195	1157	*	GNAS
chr20	57415359	57418832	3474	*	GNAS
chr20	57425758	57426859	1102	*	GNAS
chr20	57427495	57427642	148	*	GNAS
chr20	57429277	57431302	2026	*	GNAS
chr20	57463909	57464256	348	*	GNAS
chr20	57464437	57465007	571	*	GNAS
chr21	40757691	40758207	517	*	WRB
chr22	42078080	42078329	250	*	NHP2L1
chr22	42078365	42078689	325	*	NHP2L1
chr4	6107124	6107490	367	*	JAKMIP1
chr4	89618530	89619038	509	*	NAP1L5
chr5	140719225	140719273	49	*	PCDHGA2
chr6	3848904	3849577	674	*	FAM50B
chr6	3849585	3850105	521	*	FAM50B
chr6	144328421	144329239	819	*	PLAGL1
chr6	144329246	144329909	664	*	PLAGL1
chr6	160427128	160427188	61	*	IGF2R
Chr6	170054504	170055618	1114	*	WDR27
chr7	16890879	16891078	200	*
chr7	50849639	50849831	193	*	GRB10
chr7	50850197	50850299	103	*	GRB10
chr7	50850311	50850376	66	*	GRB10
chr7	50850413	50851488	1076	*	GRB10
chr7	94285642	94287241	1600	*	PEG10
chr7	130130645	130131990	1346	*	MEST
chr7	130132150	130133841	1692	*	MEST
chr7	154862774	154863380	607	*	HTR5A
chr8	1321333	1321525	193	*
chr8	37605552	37605977	426	*	ERLIN2
chr8	141108340	141110568	2229	*	TRAPPC9
chr9	98075400	98075744	345	*	FANCC
