# Supplementary material for: Genome-wide parent-of-origin DNA methylation analysis reveals the intricacies of human imprinting and suggests a germline methylation-independent mechanism of establishment
Source: HighWire-hosted journal article supplement (doi:10.1101/gr.164913.113), 2014-01-08
Supplement: Supplemental_Table_S2.docx [file Supplemental_Table_S2.docx]

| **Gene** | **Number of heterozygous samples assessed by allelic RT-PCR** |
| --- | --- |
| *WDR27* | 2 paternal and 2 uniformative monoallelic placenta samples. |
| *NHP2L1* | 1 paternal and 2 uniformative monoallelic placenta samples. 1 uniformative monoallelic leukocyte sample. |
| *ERLIN2* | 1 uninformative monoallelic leukocyte sample. |
| *ZNF331*  Isoform 1  Isoform 2  Isoform 3 | 4 maternal and 1 uniformative monoallalic placenta samples. 1 maternal and 1 uniformative monoallalic leukocyte samples.  1 paternal placenta and 1 paternal leukocyte samples.  1 paternal and 1 uniformative monoallalic leukocyte samples. |
| *miR371/2* | 4 biallelic placenta samples. |
| *C19MC* | 2 paternal and 2 uninformative monoallelic placenta samples. |
| *N4BP2l1* | 3 biallelic placenta samples . |
| *DCAF10* | 2 biallelic placenta samples. |
| *PDE4D* | 3 biallelic placenta samples. |
| *FAM196A* | 3 biallelic placenta samples. |
| *RGMA* | 10 biallelic placenta samples. |
| *AGBL3* | 7 placenta samples with paternal expression. Biallelic in 1 brain and 1 kidney sample. |
| *MCCC1* | 2 placenta samples with paternal expression, biallelic in 1 leukocyte and 2 brain samples. |
| *ZC3H12C* | 1 placenta sample with paternal expression, biallelic in 1 brain and 2 leukocyte samples. |
| *GLIS3* | 2 paternal and 1 uninformative monoallelic placenta samples. Biallelic in 1 brain and 3 kidney samples. |
| *LIN28B* | 5 placenta samples with paternal expression. |
| *ZFAT* | 6 placenta samples with paternal expression. Biallelic in 1 leukocyte sample. |
| *DNMT1* | 2 paternal and 3 uninformative monoallelic placenta samples. Biallelic in 2 kidney samples. |
| *AIM1* | 1 paternal and 2 uninformative monoallelic placenta samples. |
| *ZNF396* | Not expressed in placenta, biallelic in 1 brain sample. |
| *FAM20A* | 2 biallelic placenta samples. |

**Supplementary Table S1.**

The number of heterozygous tissue samples used to determine allelic expression of novel imprinted transcripts.
