# Supplementary material for: Genome-wide parent-of-origin DNA methylation analysis reveals the intricacies of human imprinting and suggests a germline methylation-independent mechanism of establishment
Source: HighWire-hosted journal article supplement (doi:10.1101/gr.164913.113), 2014-01-08
Supplement: Supplemental_Table_S3.xlsx [file Supplemental_Table_S3.xlsx]

## Sheet: Hoja1
Primer name	Primer sequence	Targeted SNP
Human bisulphite analysis
SNURF DMR	F- TAGGTTGTTTTTTGAGAGAAGTTAT
	R- AAAAAAAAAACTAAAACCCCTACACTAC
SNRPN region CpG40	F- GATGAATGTAATTTTTTAGATTATAG	rs34120929
	R- CCTACCACCATCCCTATAAAATC
SNRPN region CpG29	F- ATTTATGGAGGAGAAAATTTA	rs34951747
	R- TTCCRAACRAAACCACCRAAAAACCC
NDN DMR	F- AATTTTAGGGTTGTTGTGTATTT	rs3743340
	R- CCCRCCCCCAACCRCTAACCAAAACC
MRKN3 DMR	F- TTTAGTTTTTGAGTTTTGTAGAGGAG	rs2239669
	R- CCCTTTCCTTACCTATAATTAACTC
MEG8 DMR	F- GATATTAGTTAAGAGTTTGTG
	R- CCTAAAAATACTCCCTCCCTCATCTC
DIRAS3 promoter DMR	F- GAAAGATTTGGTTTTAGTTTTAGG	rs2435847
	R- AAAATAAACTCTTAAAATATCCAATTA
DIRAS3 Ex2 CpG30 DMR	F- TTTTTTAGGGGTTTTTTGTT
	R- TAATCTCTAATCTTCCTATAAAACCT
ZNF597 prom DMR	Bis F- TTTAAGATTTTATTTTAGTAGGTAAATAGG	rs2270499
	Bis R- AACAATTCTTAAAAAAACCAATTCC
	Nested Bis F- GGTGTTTAATTGGTTAATATAAAAGAAGG
ZNF597 DMR	F- GTTTATTTGTTTTAGGAATGYGTAGG	rs185148
	R- CCTAAATCTCCAACTTAACCACCAACTAC
WDR27 DMR	F- ATTTTTAGGTAATTTTTAATATAGTTT	rs4716371, rs117256282
	R- AAATTCCCCACATAACAAATC
LOC728024 DMR	F- GGTATGGTTTTTAGGAGTAATTTGAAA	rs112468369, rs74950380
	R- ACCAAAAATCAACCAATTTAACAAC
PPIEL DMR	F- TTTAGTTTAATTTTGGTATTGTTTG
	R- AATATCACCTTAACAAATCTAAAAAA
WRB DMR	F- TTGTATAGGTGTTTTAGGATTGGTA	rs2244352
	R- CAAAATCCTTCATCTACAAAACTC
NHP2L1 DMR	F- GGAGATAATGGTTTAGTAGGAATATTTATT	rs78092457
	R- TCTTCCTAATTATCCTAAAACCAAAAC
NESP-AS DMR	F- GTAGGGGAATAAGAAGGTTT	rs6026561
	R- TAAACCCCAACCAAAATCCCCT
GNAS XL DMR	F- GAATGAGAAGTGAGGAAA	rs8125112
	R- CCTATCCCAACACCCCCAAATTAC
GNAS mid CpG17	F- TTTATAGGGTTTTTTTTAGGTTTTG	rs79335353
	R- CTCCAACTTCCCTAAATAC
GNAS Ex1A DMR	F- GTTTTAGTTTTTTTAGAGGAT
	R- TTAAAAAACAAATATTAAAAAAC
GNAS Ex1A unmeth	F- GGGGGAGTTTATGGGGT
	R- CCAAAACCTCCCTTTAAC
HTR5A DMR	F- TTATTGGTTAGAGGTTGTAAATATT	rs6320, rs1800883
	R- CCCAACAAAATAAAAATAAACACTC
HTR5A unmeth	F- GAGGAAAGTTTATTGGTTAATTTG
	R- TCAACTAATAAAACCATCTCT
PEG10 DMR	F- GTTTGGTTTAGGTGTGGGATTTT
	R- CCCATTTATTTTAAAATACAACC
PEG10 unmeth	F- GTAATTYGTTGGAAAGGATTAAA	rs1609528
	R- TTCAAATCAAAATTAACCCC
H19 DMR	F- AGGGTTTTTGGTAGGTATAGAGTT
	R- TCCTATAAATATCCTATTCCCAAAT
H19 gene body	F- TTTTTTGAGAGATTTAAAGTTTTTA	rs2839704
	R- CCAAACCCTACACAAACACTTACC
ZNF331 CpG100 DMR	F- GTTGGGGGATTATTGGGTG	rs73051516
	R- CATATACAAACACAACAAAACCC
ZNF331 CpG83 DMR	F- GTGTYGGGTTTTGTTGTTGTTTG	rs7248353
	R- CCATAAACRCCAATCTCACCTACRC
C19MC DMR	F- GGTTGTTTATGTATTTTTTA
	R- CCAAATAACAAAAAAAAATATC
AGBL3 DMR	F- GGGTTGGTATTTYGTTTTTAYGY	rs114035212
	R- AACTAATTACTAAATAATCT
ZC3H12C DMR	F- TGGYGGTTTTTAGGTTTGTTTT	rs7116896
	R- AAAAAAATACRCTAAACTTTCC
FAM196A DMR	F- AGATAATTGTAGTAAATGAGGATA
	R- AACCCTAACAAACCTAAAAC
LIN28B DMR	F- ATATTTTGAAGTGTTTTTGTTGTAA	rs9404590
	R- CATACCTAAAACTAAACTATCTTCC
PDE4D DMR	F- GGTTTTTAGGGAGGG
	R- ACTAATTCATTCACTTCAAATA
RGMA DMR	F- TAGGGAGAGGTTAGTGGTAATAGGT
	R- AATCCCCAAAAACAAACATC
DCAF10 DMR	F- AATTTTYGTATTATGATTAGTTTTTA	rs75986742
	R- CTAAACTAAAAATTCCAAAAAC
MCCC1 DMR	F- TGATTTTTTAGTATAGAGGTAGT	rs937652
	R- CTCTAATCTTTAATTAATATTC
N4BP2L1 DMR	F- TAATTTTTAGAGGTTGGGTAT	rs206337
	R- CTAACAACCCRCTTTAAAAATC
GLIS3 DMR	F- TTTGGATGGGGGTTTTTATTTT	rs7852293
	R- CTCTAAACTTTAACTCCCCCACAC
ZFAT DMR	F- AAGGTTTTTATTTTTTAAAGTTGGAA	rs12546315
	R- CATAACCAAAAACCCTACTAAAAAC
DNMT1 DMR	F- GGTATTGAGGGATTTTTTATTATAGAAG	rs8112895
	R- AAATCCCCTTCTTCAAACAA
FAM20A	F- TTTTATTTTGGTTTTAAGTATA	rs986099
	R- AACRCCTCCTAACTAACCAA
AIM1 DMR	F- GATATGGAGAAGAGGTTTAG	rs1115299
	R- CCCTCTTAAATAAAAACTCCTTAAC
ZNF396 DMR	F- GTTATTAGAATCGGAAGTTGTTG	rs4291985
	R- AATTCACCATTCAAAACAAA
NNAT DMR	F- AGAGTTTATTTTTTTGTGTATA	rs6019062
	R- CCAAATCCTCTACTTCATAAAAATACC
NNAT extended	F- TTTTGGAAAGTTAATAGGGTAGGT
	R- CTTCTACCTACTCAACTTCCTCC
NAP1L5 DMR	F- GGGTTTTTTAGTTATTTGATTAGT
	R- CAAAATCTCTCTAAACCAACTC
NAP1L5 extended	F- GTATTTATGTGTTTATTTAATATTTTTTTGG
	R- TAAACCCCATACTTTAAAAAACTTACT
FAM50B region 1	F- TTTTGGATATGTGGGTGTTATATGT
	R- CTCTCCAAAAACAAAACAAAC
FAM50B region 2-DMR	Bis F- AGAGTGTTAGGTTTTTGGTAGGG	rs2239713
	Bis R-TCTCTAAATAACCACAACAACTTAC
FAM50B region 3	F- GAYGTTATTATGGAGAAGGA	rs6597007
	R- CAATACAACTCAACAAAACAATAC
Mouse bisulphite analysis
Nhp2l1 promoter	F- GATTTGGGATTTTAGTTGTT
	R- TCAATCCCTCTTAAATTAAACTATC
Wdr27 promoter	F- TTATAATAAATTAATTAAAATTTATTTTT
	R- ACATACAAAAACAACCAATTCC
Wrb promoter	F- GGTTGTTAAGTAATATTTTAT
	R- CTCATACTAAATCCCAAACACCTACAC
Htr5a promoter	F- GGAGTATGAGTGTTGGAAGAAGGG
	R- ACCCTATCCTAATCTCTCTCCA
Zc3h12c promoter	F- GGTGATGTTTTATTTTA
	R- CTCAAAAACTCCAACCCAAAC
Fam196a promoter	F- TGTTTATTGATAAGTGGAGGT
	R- AACCACTACCTCCCCRTAC
Lin28b promoter	F- TAGAATGTTTTAAATTTAAGGAGAT
	R- CCATAAAATACTTCACTAAAACAC
Agbl3 promoter	F- GGGGTTGAAGTTTTGGTTTT
	R- TCACAACTACTAATATTTAATTC
Pde4d promoter	F- AGTTGGTTATTAGGGGTAGTATTTTA
	R- CTACTCCTTCATATTACAAAACCC
Rgma promoter	F- TAGTTTATTAGTTTTTTTGGGGA
	R- CCCAAACTCTACAAACCTCCCTAC
Mccc1 promoter	F- TATATAGGTATTTAAAGGGTTGT
	R- CACCCAATTTTATAATTAACTCTTAC
N4bp2l1 promoter	F- TGGAGGGGTGGGTATTAGGTT
	R- CTAACCAAATAATAAAAACACC
Glis3 promoter	F- GTTTGATGGTTAAATGAGTATTGTTATTAG
	R- CCTAACTTTATTATAAAAATCC
Dnmt1 promoter	F- GTTGGTATTTTGTAGGTTGTAG
	R- ACATAACATAATCTTCCCCCA
Aim1 promoter	F- GTTAAGTAGTTTTTAGTYGTAG
	R- CACATCCCACCAAAATACTAAC
Fam20a promoter	F- GGTAAGTTTTTGAAAAGTTGTG
	R-ACTAACCCTACTACTCCTAA
Zfat promoter	F- GGTTTTTTTATTGTATATTA
	R- CTAAAAAAATCAAAATAAAAAAC
ChIP primers
H19 DMR	F- TGAATTTGCCCACAGGTGTTC
	R- GCCTTGGGTCACCTTCAGACT
LOC10012864	F- AGGGCCTCCAGTCCACCCCTAGA
	R- GGTTGGCGCTGTCCACGGTCTG
GNAS	F- TCCCGCAGCTCCTGCTCTGGT
	R- CGGGAAGGGGAGGGTGTCGGTC
Human allelic RT-PCRs
WDR27	Geno F- GAAACCTCTTAAATTTATGG	rs9478086
	Geno/RT R- TGTGGTGCTGACGCATAACCA
	Isoform 1F- AGTCTGGGCTGTGCAGCCAGCCA
	Isoform 2F- GAATAAGATTATTGTGTATTCTTTTCTT
ERLIN2	RT F- TCGAAGCGACGGCCCGGAAGGAAGT
	Isoform 1R- CTTGCTCAGGGTCCCTTTTATGAAGATTC
	Isoform 2R- GGTCAGGTCCTGTTGCAAAGCCAG
NHP2L1	Geno F- AATCCATTCAGCAGTCCATTGA	rs132806
	Geno/RT R- GGGATAGCAACCCTGTAAAACAG
	Isoform 1F- TCAGCTGCGCTCCCCTAGGAGTGCT
	Isoform 2F- CGGTGTCCGGCAAGAGACTACCAAGAC
ZNF331	Geno F- ATGAAAATAAGAGTTTACCTACA	rs8109631
	Geno/RT R- CTCTGATGTGTTCTAGGAGGGGTGCC
	Isoform 1F- CTTTGCACTTCTGTCAGGTTGAC
	Isoform 2F- TGGGTGCGCGTGCGCATGCGCGCT
	Isoform 3F- ATGCGCGCTGGCCTCCATGGGTG
C19MC	F- ACAGAGTTCAGTAAGTATTGGCTTCCCA	rs55765443
	R- ACTCAATCACTAATTGAACAAAATCCA
Mir-371/2	F- CCAAGTGGAAAGTGCTGCGAC	rs3859501
	R- AGGCGCACAGCCGCCCTCTGA
AGBL3	Geno F- CACATTGAATAGTGTTGAAAGGAAA	rs2348049
	Geno R- ACCGTGTTGGGCTCAATG
	RT F- TCAAACACTGGAAAAGATGTCAG
	RT R- GGGCTCAATGGACCAGAAG
ZC3H12C	RT F- ACCCTCTTGGCAGACATGGCCCCA	rs1026608
	Geno F- AAGAAGTGTACCTATGGACACA
	Geno/RT R- GGTGGGAAGCTTTTCTTCTAGG
FAM196A	Geno/ RT F- TCCCACTGACACCTCTGTTG	rs2489386
	Geno/RT R- CATTCTGTGCCTCGCAGATA
LIN28B	Geno/RT F- GTATTGGTCCTGTTAGGTTTCGG	rs221634
	Geno/RT R- TGTCTCATTTGAGTCATGCTATT
PDE4D	Geno/RT F- CGGCTGATTCATTCACTTCA	rs7706419
	Geno/RT R- GAGCGGAAAAACCACTATGC
RGMA	Geno/RT F- CTCCGTCCTCTCGGCTTC	rs2272453
	Geno/RT R- TTCCCAGTGTGTCTCTGGTG
DCAF10	Geno/RT F- GCCACTGAACTCCAGTTCTTCTGG	rs41278313
	Geno/RT R- TGTTGATAGGAACAAAATATCAAGT
MCCC1	RT F- CAATGAGGACTTGGTAATGTTTC	rs937652
	Geno F- GTTCCTCTCCGCCGCCACCAG
	Geno/RT R- TAGGCTCAGGCTCCGACGGT
N4BP2L1	Geno/RT F- ACTCCCAAACATTTGAGCTGCCGA	rs10492397
	Geno/RT R- GCCATTGCTACTTTGATAATAATCTATG
GLIS3	Geno/RT F- ATGGGGGTTTTCATTTCCGA	rs7852293
	Geno R- CCGGGATTTCCACAACAAAGCC
	RT R- CCAATGTCACTAATGACTCCTTTC
AIM1	Geno F- CGCAGAAATCCACCGACTCC	rs11152999
	Geno R- TGCCCTTTGGTACCGGGGCT
	RT R- GGGTTTTAAGATTTAGTTCCACATG
DNMT1	Geno F- GTTTGTCACTTTCCGTGCGAG	rs2228612
	RT F- CCAAACAGAAACTGAAGGAGGAGC
	Geno RT R- TTCTCCTCGTCTTTTTCAT
FAM20A	Geno/RT F- CACGATCGTGCACAACTTTTCC	rs20155679
	Geno R- TCCAGCGGGCCACCTTCCTCCGG	rs986099
	RT R- AAGGCTTTCTCATCTTGACTGTA
ZFAT	Geno/RT F- CTCATCAAGCACATCCGAGA	rs3739434
	Geno/RT R- GGAGCTGACGAACTTCTTGC
Mouse allelic RT-PCRs
Nhp2l1	F- GCTCCAGAAGTGCTCTGTCC
	R- TTGTGTGATGCAGGGGTAAA
Wdr27	F- ACCACAGGGATGGACAGAAG	rs46352129
	R- AGCCAAAAGCAGCATGAGTT
Wrb	F- CCCTGATTGGCTTGGAACTA
	R- ACCAAGAGGGAAGGCCTAAA
Htr5a	F- CAACAGCGTCTCCCCCGTAC	rs32113839
	R- TCATGTCTCTGCTGGAGTGG
Zc3h12c	F- CATGGGCCTGAAGGATCACCTGGGGC	rs29943323
	R- TCTAGTTTACGTAAAATTTCCTGAT
Lin28b	F- AGGAAGTGAAAGAAGACCTAAAGGGA
	R- GTAGACTTCCCGCCCGGGTGAAGGG
Agbl3	F- GGCCATACCACTGTGAGGTC	rs37249341
	R- AAACACCAGCGTGTTGTCAC
Pde4d	F- CCCACTAGTCCAACCTCAGC	rs48218518
	R- CGTTCCTGAAAAATGGTGTG
Rgma	F- ACCCTCGCCTTCCTTCTCT
	R- TGCTGGCTCATAAGGTCCTC
Dcaf10	F- TGATCTTGCATGAGCTGGAC	rs27862159
	R- GCACGTGACCAAAGAGAACA
Mccc1	F- AAAGCTGGAGACTCTCTGATGG	rs13473728
	R- AGACTGAAGAGGCACTTGCTG
N4bp2l1	F- GAACCGCTGAAGAATCAAGG
	R- AGAGGCGTCATGGTTGCTTA
Dnmt1	F- GAGTCTTCGACGTCACACCAGAGAG
	R- ACTGATTGATTGGCCCGAGGTTTTTGC
Aim1	F- CAGGAAGGAGGGTGGCCTGC
	R- TCCAGAAAAGGAATGGCCTGGGT
Glis3	F- CTCCACCGGACATCAAGAACCC
	R- TGGAGGTGAAATGGGTCCCAGT
Zfat	F- GAATTTGTGTGTCCAGAAATTGATG
	R- TGAATTACATGGCGTTTAAGGCAGT
Supplementary Table S2.
Primer sequences for PCRs performed in this study.
